# Supplementary material for: A Systematic Review and Meta-Analysis on Effects of Bicarbonate Therapy on Kidney Outcomes
Source: PubMed Central journal article supplement — Kidney Int Rep. 2020 Dec 31;6(3):695–705. doi: 10.1016/j.ekir.2020.12.019 (PMC7938083; doi:10.1016/j.ekir.2020.12.019), 2020-12-31

## **SUPPLEMENTARY MATERIAL**

|                                                                                                                                                                                                  |    |
|--------------------------------------------------------------------------------------------------------------------------------------------------------------------------------------------------|----|
| TABLE S1. ELECTRONIC SEARCH STRATEGY                                                                                                                                                             | 4  |
| TABLE S2. GRADE ASSESSMENT OF CERTAINTY OF EVIDENCE                                                                                                                                              | 5  |
| TABLE S3. INDIVIDUAL STUDY BIAS ASSESSMENT                                                                                                                                                       | 10 |
| FIGURE S1. SUBGROUP ANALYSIS OF THE EFFECT OF BICARBONATE THERAPY ON CHANGE IN KIDNEY FUNCTION 1: ACCORDING TO THE USE OF PLACEBO OR NO STUDY MEDICATION IN THE CONTROL ARM.                     | 11 |
| FIGURE S2. SUBGROUP ANALYSIS OF THE EFFECT OF BICARBONATE THERAPY ON THE CHANGE IN KIDNEY FUNCTION 2: ACCORDING TO FOLLOW-UP TIME.                                                               | 12 |
| FIGURE S3. SUBGROUP ANALYSIS OF THE EFFECT OF BICARBONATE THERAPY ON THE CHANGE IN KIDNEY FUNCTION 3: ACCORDING TO TRIAL QUALITY.                                                                | 13 |
| FIGURE S4. CUMULATIVE METANALYSIS OF THE EFFECT OF BICARBONATE THERAPY ON THE CHANGE IN KIDNEY FUNCTION                                                                                          | 14 |
| FIGURE S5. EFFECT OF BICARBONATE THERAPY ON CHANGE IN EGFR                                                                                                                                       | 15 |
| FIGURE S6. EFFECT OF BICARBONATE THERAPY ON CHANGE IN CREATININE CLEARANCE                                                                                                                       | 16 |
| FIGURE S7. SUBGROUP ANALYSIS OF THE EFFECT OF BICARBONATE THERAPY ON EGFR (mL/min/1.73m <sup>2</sup> ) <sub>1</sub> : ACCORDING TO THE USE OF PLACEBO OR NO STUDY MEDICATION IN THE CONTROL ARM. | 17 |
| FIGURE S8. SUBGROUP ANALYSIS OF THE EFFECT OF BICARBONATE THERAPY ON EGFR (mL/min/1.73m <sup>2</sup> ) <sub>2</sub> : ACCORDING TO FOLLOW-UP TIME.                                               | 18 |
| FIGURE S9. SUBGROUP ANALYSIS OF THE EFFECT OF BICARBONATE THERAPY ON EGFR (mL/min/1.73m <sup>2</sup> ) <sub>3</sub> : ACCORDING TO TRIAL QUALITY.                                                | 19 |
| FIGURE S10. EFFECT OF BICARBONATE THERAPY ON CHANGE IN SERUM CREATININE                                                                                                                          | 20 |

|                                                                                                                                                                                   |    |
|-----------------------------------------------------------------------------------------------------------------------------------------------------------------------------------|----|
| FIGURE S11. SUBGROUP ANALYSIS OF THE EFFECT OF BICARBONATE THERAPY ON PROGRESSION TO KIDNEY FAILURE 1: ACCORDING TO THE USE OF PLACEBO OR NO STUDY MEDICATION IN THE CONTROL ARM. | 21 |
| FIGURE S12. SUBGROUP ANALYSIS OF THE EFFECT OF BICARBONATE THERAPY ON THE PROGRESSION TO KIDNEY FAILURE 2: ACCORDING TO FOLLOW-UP TIME                                            | 22 |
| FIGURE S13. SUBGROUP ANALYSIS OF THE EFFECT OF BICARBONATE THERAPY ON THE PROGRESSION TO KIDNEY FAILURE 3: ACCORDING TO TRIAL QUALITY                                             | 23 |
| FIGURE S14. EFFECT OF BICARBONATE THERAPY ON RAPID DECLINE IN KIDNEY FUNCTION                                                                                                     | 24 |
| FIGURE S15. EFFECT OF BICARBONATE THERAPY ON CHANGE IN PROTEINURIA                                                                                                                | 25 |
| FIGURE S16. EFFECT OF BICARBONATE THERAPY ON CHANGE IN SERUM BICARBONATE                                                                                                          | 26 |
| FIGURE S17. SUBGROUP ANALYSIS OF THE EFFECT OF BICARBONATE THERAPY ON SERUM BICARBONATE (MMOL/L)1: ACCORDING TO THE USE OF PLACEBO OR NO STUDY MEDICATION IN THE CONTROL ARM.     | 27 |
| FIGURE S18. SUBGROUP ANALYSIS OF THE EFFECT OF BICARBONATE THERAPY ON SERUM BICARBONATE (MMOL/L) 2: ACCORDING TO FOLLOW-UP TIME.                                                  | 28 |
| FIGURE S19. SUBGROUP ANALYSIS OF THE EFFECT OF BICARBONATE THERAPY ON SERUM BICARBONATE (MMOL/L) 3: ACCORDING TO TRIAL QUALITY.                                                   | 29 |
| FIGURE S20. EFFECT OF BICARBONATE THERAPY ON CHANGE IN SYSTOLIC BLOOD PRESSURE                                                                                                    | 30 |
| FIGURE S21. EFFECT OF BICARBONATE THERAPY ON CHANGE IN DIASTOLIC BLOOD PRESSURE                                                                                                   | 31 |
| FIGURE S22. EFFECT OF BICARBONATE THERAPY ON WORSENING OF BLOOD PRESSURE                                                                                                          | 32 |
| FIGURE S23. EFFECT OF BICARBONATE THERAPY ON WORSENING OF EDEMA                                                                                                                   | 33 |
| FIGURE S24. EFFECT OF BICARBONATE THERAPY ON CHANGE IN BODY WEIGHT                                                                                                                | 34 |
| FIGURE S25. EFFECT OF BICARBONATE THERAPY ON ALL-CAUSE MORTALITY                                                                                                                  | 35 |
| FIGURE S26. EFFECT OF BICARBONATE THERAPY ON ADMISSIONS FOR HEART FAILURE                                                                                                         | 36 |
| FIGURE S27. FUNNEL PLOT OF EFFECT OF BICARBONATE THERAPY ON KIDNEY FUNCTION                                                                                                       | 37 |

|                                                                                                                           |    |
|---------------------------------------------------------------------------------------------------------------------------|----|
| FIGURE S28. FUNNEL PLOT OF EFFECT OF BICARBONATE THERAPY ON THE PROGRESSION TO KIDNEY FAILURE                             | 38 |
| FIGURE S29. FUNNEL PLOT OF THE EFFECT OF BICARBONATE THERAPY ON EGFR (mL/MIN/1.73M <sup>2</sup> )                         | 39 |
| FIGURE S30. FUNNEL PLOT OF THE EFFECT OF BICARBONATE THERAPY ON SERUM BICARBONATE                                         | 40 |
| FIGURE S31. FUNNEL PLOT OF THE EFFECT OF BICARBONATE THERAPY ON WEIGHT (KG)                                               | 41 |
| FIGURE S32. FUNNEL PLOT OF THE EFFECT OF BICARBONATE THERAPY ON SYSTOLIC BLOOD PRESSURE                                   | 42 |
| FIGURE S33. FUNNEL PLOT OF THE EFFECT OF BICARBONATE THERAPY ON DIASTOLIC BLOOD PRESSURE                                  | 43 |
| FIGURE S34. SUBGROUP ANALYSIS OF THE EFFECT OF BICARBONATE THERAPY ON SYSTOLIC BLOOD PRESSURE ACCORDING TO TRIAL QUALITY  | 44 |
| FIGURE S35. SUBGROUP ANALYSIS OF THE EFFECT OF BICARBONATE THERAPY ON DIASTOLIC BLOOD PRESSURE ACCORDING TO TRIAL QUALITY | 45 |
| FIGURE S36. SUBGROUP ANALYSIS OF THE EFFECT OF BICARBONATE THERAPY ON CHANGE IN WEIGHT ACCORDING TO TRIAL QUALITY         | 46 |

**Table S1. Electronic search strategy**

| Database | Search terms                                                                                                                                                                                                                                                                                                                                                                                                                                                                                                                                                                                                                                      |
|----------|---------------------------------------------------------------------------------------------------------------------------------------------------------------------------------------------------------------------------------------------------------------------------------------------------------------------------------------------------------------------------------------------------------------------------------------------------------------------------------------------------------------------------------------------------------------------------------------------------------------------------------------------------|
| Medline  | <ol style="list-style-type: none"> <li>1. exp Kidney Failure, Chronic/ or exp Renal Insufficiency/ or exp Renal Insufficiency, Chronic/</li> <li>2. exp Proteinuria/ or exp Albuminuria/ or microalbuminuria.tw.</li> <li>3. 1 or 2</li> <li>4. exp Bicarbonates/ or exp Sodium Bicarbonate/ or exp Alkalies/ or alkali therapy.tw. or alkalinisation.tw.</li> <li>5. exp Acidosis/ or exp Acid-Base Imbalance/ or metabolic acidosis.tw.</li> <li>6. 4 or 5</li> <li>7. exp Clinical Trial/ or exp Controlled Clinical Trial/ or exp Randomized Controlled Trials/</li> <li>8. 3 and 6 and 7</li> </ol>                                          |
| Embase   | <ol style="list-style-type: none"> <li>1. exp chronic kidney disease/ or exp chronic kidney failure/</li> <li>2. exp albuminuria/ or exp proteinuria/ or exp microalbuminuria/</li> <li>3. 1 or 2</li> <li>4. exp bicarbonate blood level/ or exp bicarbonate/ or exp alkalization/ or exp alkalizing agent/ or Sodium Bicarbonate.tw. or alkali therapy.tw.</li> <li>5. exp acidosis/ or exp metabolic acidosis/ or exp "disorders of acid base balance"/</li> <li>6. 4 or 5</li> <li>7. exp controlled clinical trial/ or exp clinical trial/ or exp controlled study/ or exp randomized controlled trial/</li> <li>8. 3 and 6 and 7</li> </ol> |
| CENTRAL  | <ol style="list-style-type: none"> <li>1. exp Kidney Failure, Chronic/ or exp Renal Insufficiency/ or exp Renal Insufficiency, Chronic/ or exp Kidney Transplantation/ or Renal Dialysis/ or exp Renal Replacement Therapy/</li> <li>2. exp Proteinuria/ or exp Albuminuria/ or microalbuminuria.tw.</li> <li>3. 1 or 2</li> <li>4. exp Bicarbonates/ or exp Sodium Bicarbonate/ or exp Alkalies/ or alkali therapy.tw. or alkalinisation.tw.</li> <li>5. exp Acidosis/ or exp Acid-Base Imbalance/ or metabolic acidosis.tw.</li> <li>6. 4 or 5</li> <li>7. 3 and 6</li> </ol>                                                                   |

**Table S2. GRADE assessment of certainty of evidence**

Table outlining the certainty of the evidence according to the GRADE assessment tool.

| Certainty assessment                                                                                     |                      |                      |              |                      |                      |                               | Summary of findings |                   |                          |                              |                                                                    |
|----------------------------------------------------------------------------------------------------------|----------------------|----------------------|--------------|----------------------|----------------------|-------------------------------|---------------------|-------------------|--------------------------|------------------------------|--------------------------------------------------------------------|
| № of participants (studies)                                                                              | Risk of bias         | Inconsistency        | Indirectness | Imprecision          | Other considerations | Overall certainty of evidence | Study event rates   |                   | Relative effect (95% CI) | Anticipated absolute effects |                                                                    |
|                                                                                                          |                      |                      |              |                      |                      |                               | With Control        | With Intervention |                          | Risk with Control            | Risk difference with Intervention                                  |
| <b>RCTs comparing bicarbonate therapy to placebo or no medication in delaying CKD progression</b>        |                      |                      |              |                      |                      |                               |                     |                   |                          |                              |                                                                    |
| <b>Change in Kidney Function (follow up: median 12 months; assessed with: eGFR change / CrCl change)</b> |                      |                      |              |                      |                      |                               |                     |                   |                          |                              |                                                                    |
| 2405 (14 RCTs)                                                                                           | serious <sup>a</sup> | not serious          | not serious  | serious <sup>c</sup> | none                 | ⊕⊕○○<br>LOW                   | -                   | -                 | -                        | -                            | <b>SMD 0.26 SD higher</b><br>(0.13 higher to 0.40 higher)          |
| <b>Change in eGFR (follow up: median 12 months; assessed with: change in eGFR)</b>                       |                      |                      |              |                      |                      |                               |                     |                   |                          |                              |                                                                    |
| 1505 (11 RCTs)                                                                                           | serious <sup>a</sup> | serious <sup>b</sup> | not serious  | serious <sup>c</sup> | none                 | ⊕○○○<br>VERY LOW              | -                   | -                 | -                        | -                            | <b>WMD 2.63 mL/min/1.73 higher</b><br>(0.70 higher to 4.55 higher) |
| <b>Change in creatinine clearance (follow up: median 12 months; assessed with: change CrCl)</b>          |                      |                      |              |                      |                      |                               |                     |                   |                          |                              |                                                                    |
| 1074 (3 RCTs)                                                                                            | serious <sup>a</sup> | not serious          | not serious  | serious <sup>c</sup> | none                 | ⊕⊕○○<br>LOW                   | -                   | -                 | -                        | -                            | <b>WMD 5.77 mL/min/1.73 higher</b><br>(3.56 higher to 7.99 higher) |
| <b>Change in serum creatinine (follow up: median 12 months; assessed with: serum creatinine)</b>         |                      |                      |              |                      |                      |                               |                     |                   |                          |                              |                                                                    |

| Certainty assessment                                                                                                                                   |                      |                      |              |                           |                      |                               | Summary of findings |                   |                                  |                              |                                                           |
|--------------------------------------------------------------------------------------------------------------------------------------------------------|----------------------|----------------------|--------------|---------------------------|----------------------|-------------------------------|---------------------|-------------------|----------------------------------|------------------------------|-----------------------------------------------------------|
| No of participants (studies)                                                                                                                           | Risk of bias         | Inconsistency        | Indirectness | Imprecision               | Other considerations | Overall certainty of evidence | Study event rates   |                   | Relative effect (95% CI)         | Anticipated absolute effects |                                                           |
|                                                                                                                                                        |                      |                      |              |                           |                      |                               | With Control        | With Intervention |                                  | Risk with Control            | Risk difference with Intervention                         |
| 732 (6 RCTs)                                                                                                                                           | serious <sup>a</sup> | serious <sup>b</sup> | not serious  | very serious <sup>c</sup> | none                 | ⊕⊖⊖⊖<br>VERY LOW              | -                   | -                 | -                                | -                            | <b>WMD 0.2 μmol/L lower</b><br>(0.46 lower to 0.06 lower) |
| <b>progression to kidney failure (follow up: median 12 months; assessed with: number of events initiation of RRT)</b>                                  |                      |                      |              |                           |                      |                               |                     |                   |                                  |                              |                                                           |
| 2371 (14 RCTs)                                                                                                                                         | serious <sup>a</sup> | not serious          | not serious  | serious <sup>c</sup>      | none                 | ⊕⊕⊖⊖<br>LOW                   | 154/1095 (14.2%)    | 81/1201 (6.7%)    | <b>RR 0.53</b><br>(0.32 to 0.89) | 140 per 1,000                | <b>67 fewer per 1,000</b><br>(97 fewer to 16 fewer)       |
| <b>Rapid decline of kidney function (follow up: median 12 months; assessed with: number of events with decrease in eGFR &gt;3mL/min/1.73 per year)</b> |                      |                      |              |                           |                      |                               |                     |                   |                                  |                              |                                                           |
| 1481 (7 RCTs)                                                                                                                                          | serious <sup>a</sup> | serious <sup>b</sup> | not serious  | not serious               | none                 | ⊕⊕⊖⊖<br>LOW                   | 156/705 (22.1%)     | 50/714 (7.0%)     | <b>RR 0.32</b><br>(0.20 to 0.52) | 221 per 1,000                | <b>150 fewer per 1,000</b><br>(177 fewer to 106 fewer)    |
| <b>Change in proteinuria (follow up: median 12 months; assessed with: urinary protein estimation)</b>                                                  |                      |                      |              |                           |                      |                               |                     |                   |                                  |                              |                                                           |
| 854 (6 RCTs)                                                                                                                                           | serious <sup>a</sup> | not serious          | not serious  | very serious <sup>c</sup> | none                 | ⊕⊖⊖⊖<br>VERY LOW              | -                   | -                 | -                                | -                            | <b>SMD 0.09 SD lower</b><br>(0.27 lower to 0.09 higher)   |
| <b>Change in serum bicarbonate bicarbonate (follow up: median 12 months; assessed with: serum bicarbonate)</b>                                         |                      |                      |              |                           |                      |                               |                     |                   |                                  |                              |                                                           |

| Certainty assessment                                                                                           |                      |                      |              |                      |                      |                               | Summary of findings |                   |                                  |                              |                                                               |
|----------------------------------------------------------------------------------------------------------------|----------------------|----------------------|--------------|----------------------|----------------------|-------------------------------|---------------------|-------------------|----------------------------------|------------------------------|---------------------------------------------------------------|
| № of participants (studies)                                                                                    | Risk of bias         | Inconsistency        | Indirectness | Imprecision          | Other considerations | Overall certainty of evidence | Study event rates   |                   | Relative effect (95% CI)         | Anticipated absolute effects |                                                               |
|                                                                                                                |                      |                      |              |                      |                      |                               | With Control        | With Intervention |                                  | Risk with Control            | Risk difference with Intervention                             |
| 2103 (13 RCTs)                                                                                                 | serious <sup>a</sup> | serious <sup>b</sup> | not serious  | serious <sup>c</sup> | none                 | ⊕○ ○ ○<br>VERY LOW            | -                   | -                 | -                                | -                            | <b>WMD 2.59 mmol/L higher</b><br>(1.51 higher to 3.66 higher) |
| <b>Change in systolic blood pressure (follow up: median 12 months; assessed with: systolic blood pressure)</b> |                      |                      |              |                      |                      |                               |                     |                   |                                  |                              |                                                               |
| 2250 (12 RCTs)                                                                                                 | serious <sup>a</sup> | not serious          | not serious  | serious <sup>c</sup> | none                 | ⊕⊕○ ○<br>LOW                  | -                   | -                 | -                                | -                            | <b>WMD 0.57 mmHg lower</b><br>(2.32 lower to 1.18 higher)     |
| <b>Change in diastolic blood pressure (follow up: median 12 months; assessed with: change in DBP mmHg)</b>     |                      |                      |              |                      |                      |                               |                     |                   |                                  |                              |                                                               |
| 2098 (10 RCTs)                                                                                                 | serious <sup>a</sup> | not serious          | not serious  | serious <sup>c</sup> | none                 | ⊕⊕○ ○<br>LOW                  | -                   | -                 | -                                | -                            | <b>WMD 0.88 mmHg higher</b><br>(0.61 lower to 2.38 higher)    |
| <b>Worse blood pressure (follow up: median 12 months; assessed with: number of events)</b>                     |                      |                      |              |                      |                      |                               |                     |                   |                                  |                              |                                                               |
| 1383 (5 RCTs)                                                                                                  | serious <sup>a</sup> | not serious          | not serious  | serious <sup>c</sup> | none                 | ⊕⊕○ ○<br>LOW                  | 53/249 (21.3%)      | 75/339 (22.1%)    | <b>RR 1.36</b><br>(1.05 to 1.77) | 213 per 1,000                | <b>77 more per 1,000</b><br>(11 more to 164 more)             |
| <b>Peripheral oedema (follow up: median 12 months; assessed with: number of events)</b>                        |                      |                      |              |                      |                      |                               |                     |                   |                                  |                              |                                                               |

| Certainty assessment                                                                               |                      |               |              |                           |                      |                               | Summary of findings |                   |                                  |                              |                                                         |
|----------------------------------------------------------------------------------------------------|----------------------|---------------|--------------|---------------------------|----------------------|-------------------------------|---------------------|-------------------|----------------------------------|------------------------------|---------------------------------------------------------|
| № of participants (studies)                                                                        | Risk of bias         | Inconsistency | Indirectness | Imprecision               | Other considerations | Overall certainty of evidence | Study event rates   |                   | Relative effect (95% CI)         | Anticipated absolute effects |                                                         |
|                                                                                                    |                      |               |              |                           |                      |                               | With Control        | With Intervention |                                  | Risk with Control            | Risk difference with Intervention                       |
| 818 (6 RCTs)                                                                                       | serious <sup>a</sup> | not serious   | not serious  | serious <sup>c</sup>      | none                 | ⊕⊕○○<br>LOW                   | 92/355 (25.9%)      | 109/445 (24.5%)   | <b>RR 1.16</b><br>(0.90 to 1.50) | 259 per 1,000                | <b>132 more per 1,000</b><br>(16 more to 303 more)      |
| <b>Change in weight (follow up: median 12 months; assessed with: weight in kg)</b>                 |                      |               |              |                           |                      |                               |                     |                   |                                  |                              |                                                         |
| 1662 (8 RCTs)                                                                                      | serious <sup>a</sup> | not serious   | not serious  | serious <sup>c</sup>      | none                 | ⊕⊕○○<br>LOW                   | -                   | -                 | -                                | -                            | <b>WMD 0.11 kg lower</b><br>(0.93 lower to 0.70 higher) |
| <b>Admission with heart failure (follow up: median 12 months; assessed with: number of events)</b> |                      |               |              |                           |                      |                               |                     |                   |                                  |                              |                                                         |
| 708 (5 RCT)                                                                                        | serious <sup>a</sup> | not serious   | not serious  | very serious <sup>c</sup> | none                 | ⊕○○○<br>VERY LOW              | 3/310 (1.0%)        | 5/394 (1.3%)      | <b>RR 1.19</b><br>(0.30 to 4.67) | 52 per 1,000                 | <b>2 more per 1,000</b><br>(7 fewer to 36 more)         |
| <b>Mortality (follow up: median 12 months; assessed with: number of deaths)</b>                    |                      |               |              |                           |                      |                               |                     |                   |                                  |                              |                                                         |
| 1974 (9 RCT)                                                                                       | serious <sup>a</sup> | not serious   | not serious  | very serious <sup>c</sup> | none                 | ⊕○○○<br>VERY LOW              | 38/902 (4.2%)       | 30/1011 (3.0%)    | <b>RR 0.81</b><br>(0.39 to 1.68) | 33 per 1,000                 | <b>8 fewer per 1,000</b><br>(26 fewer to 29 more)       |

CI: Confidence interval; RR: Risk ratio



### *Explanations*

- a. Unclear or high risk of bias
- b. High heterogeneity
- c. Wide confidence interval

**Table S3. Individual study bias assessment**

Table outlining sources of bias for individual studies included in our meta-analysis.

| Study            | Year | Random sequence generation | Allocation concealment | Blinding of participants | Blinding of investigators | Blinding of outcome assessors | Incomplete outcome data | Selective outcome reporting | Other bias |
|------------------|------|----------------------------|------------------------|--------------------------|---------------------------|-------------------------------|-------------------------|-----------------------------|------------|
| Mathur           | 2006 | Unclear                    | Unclear                | Low                      | High                      | Unclear                       | Low                     | Unclear                     | Low        |
| de Brito-Ashurst | 2009 | Low                        | Low                    | High                     | High                      | Low                           | Low                     | Low                         | Low        |
| Disthabanchong   | 2010 | Unclear                    | Unclear                | High                     | High                      | Unclear                       | Low                     | Unclear                     | Low        |
| Mahajan          | 2010 | Low                        | Unclear                | Low                      | Low                       | Low                           | Low                     | Unclear                     | Low        |
| Jeong            | 2014 | Unclear                    | Unclear                | High                     | High                      | Unclear                       | Low                     | Unclear                     | Low        |
| Bellasi          | 2016 | Unclear                    | Unclear                | High                     | High                      | Unclear                       | Low                     | Low                         | Low        |
| Yan              | 2017 | Unclear                    | Unclear                | Low                      | High                      | Unclear                       | Low                     | Unclear                     | Low        |
| Dubey            | 2018 | Low                        | Low                    | High                     | High                      | Low                           | Low                     | Unclear                     | Low        |
| Alva             | 2019 | Unclear                    | Unclear                | High                     | High                      | High                          | Low                     | Unclear                     | Low        |
| Di Iorio         | 2019 | Unclear                    | High                   | High                     | High                      | High                          | Low                     | Low                         | Low        |
| Goraya           | 2020 | Low                        | High                   | High                     | High                      | High                          | Low                     | Low                         | Low        |
| Witham           | 2020 | Low                        | Low                    | Low                      | Low                       | Low                           | High                    | High                        | Low        |
| Melamed          | 2020 | Low                        | Low                    | Low                      | Low                       | Low                           | High                    | Unclear                     | Low        |
| Raphael          | 2020 | Low                        | Low                    | Low                      | Low                       | Unclear                       | Low                     | Unclear                     | Low        |
| Raphael          | 2020 | Low                        | Low                    | Low                      | Low                       | Unclear                       | Low                     | Unclear                     | Low        |

**Figure S1. Subgroup analysis of the effect of bicarbonate therapy on change in kidney function 1: according to the use of placebo or no study medication in the control arm.**

Forest plot showing subgroup analysis according to the use of placebo or no study medication on the effect of bicarbonate therapy on the change in kidney function. Interaction p-value 0.22.

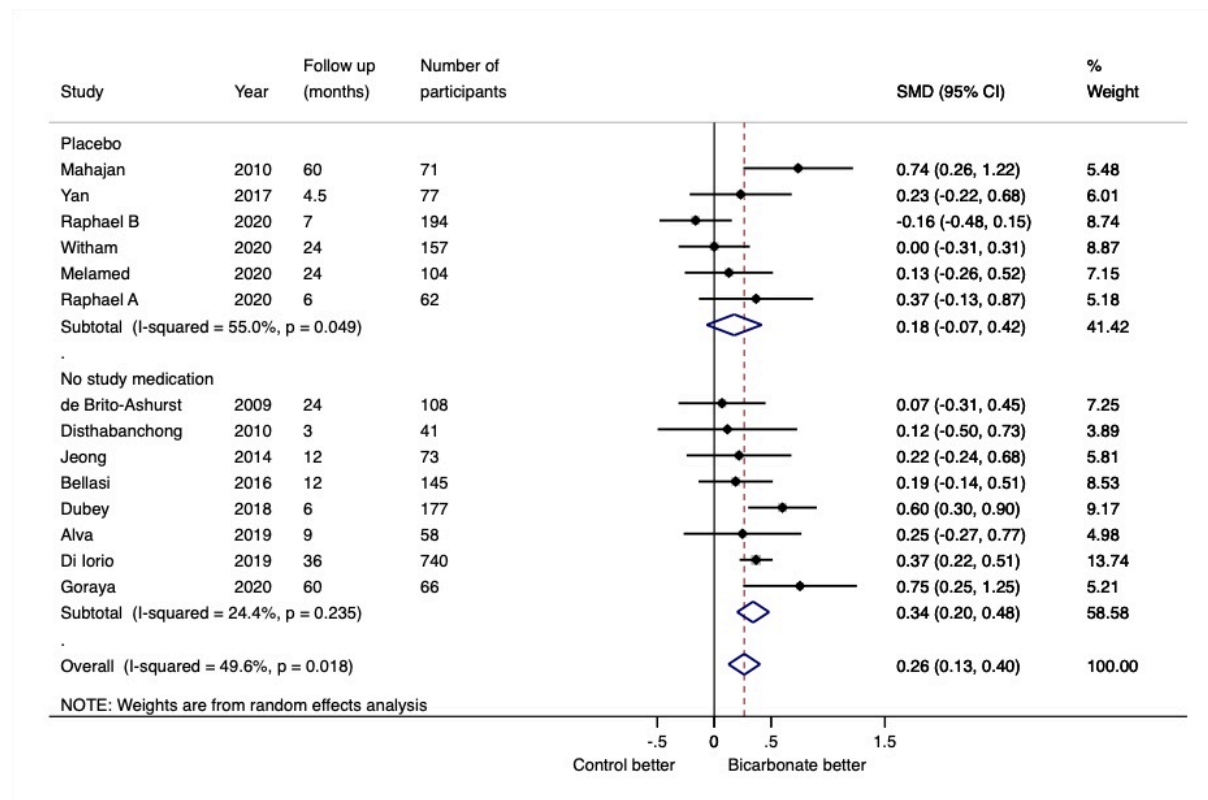

**Figure S2. Subgroup analysis of the effect of bicarbonate therapy on the change in kidney function 2: according to follow-up time.**

Forest plot showing subgroup analysis according to follow up time less or more than 12 months on the effect of bicarbonate therapy on the change in kidney function. Interaction p-value 0.45.

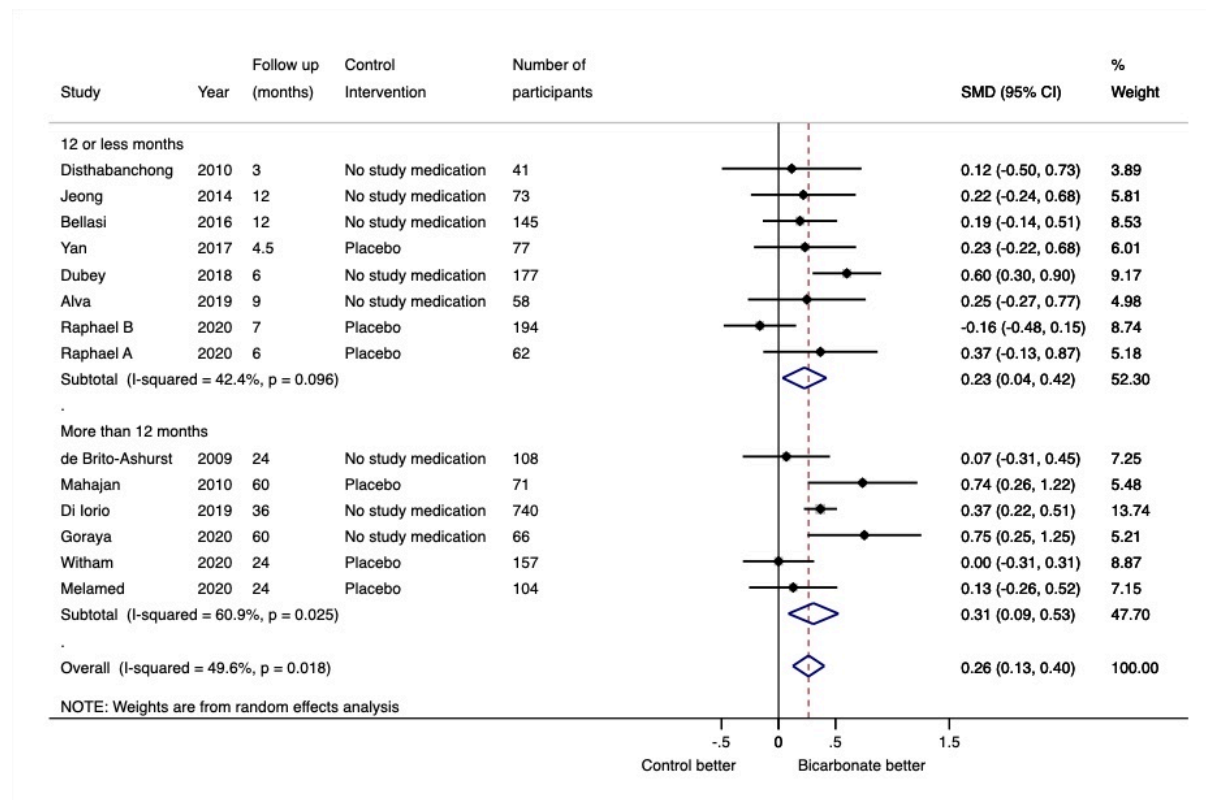

**Figure S3. Subgroup analysis of the effect of bicarbonate therapy on the change in kidney function 3: according to trial quality.**

Forest plot showing subgroup analysis according to trial quality on the effect of bicarbonate therapy on the change in kidney function. Interaction p-value 0.03.

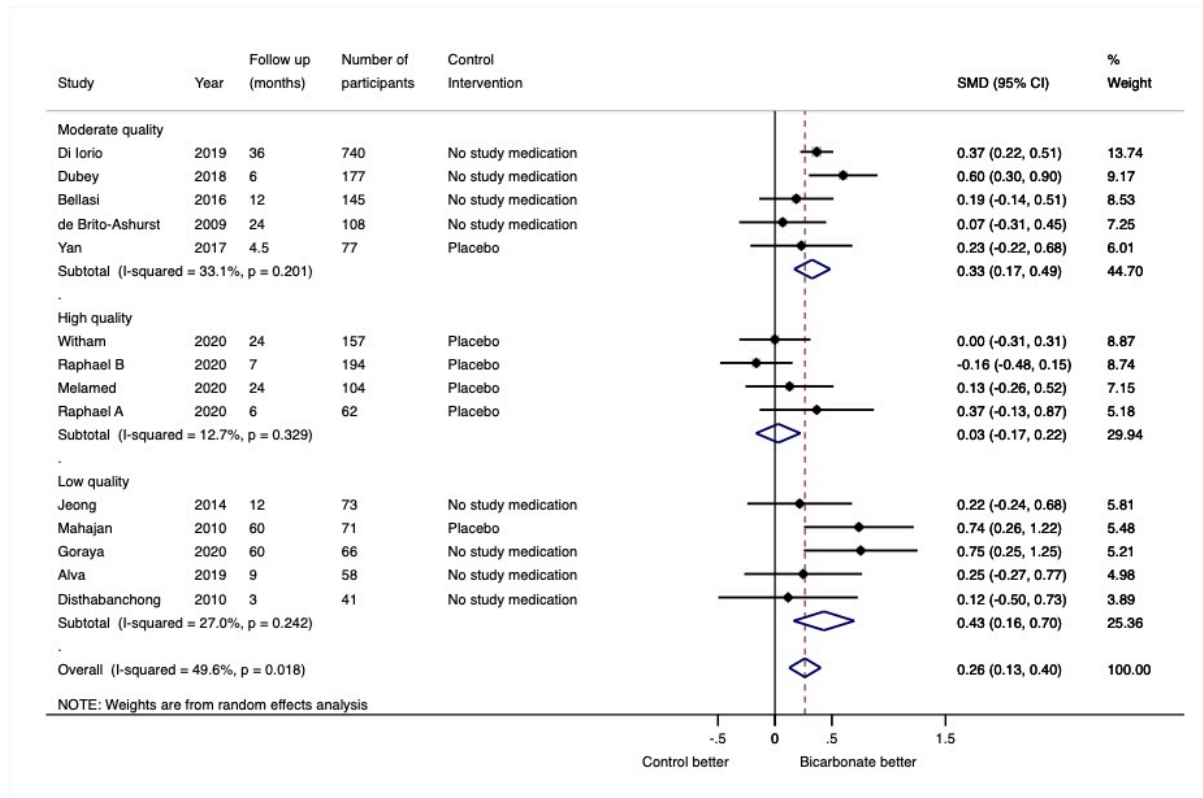

**Figure S4. Cumulative metanalysis of the effect of bicarbonate therapy on the change in kidney function**

Forest plot showing cumulative effect over time of bicarbonate therapy on the change in kidney function (measured by eGFR or CrCl)

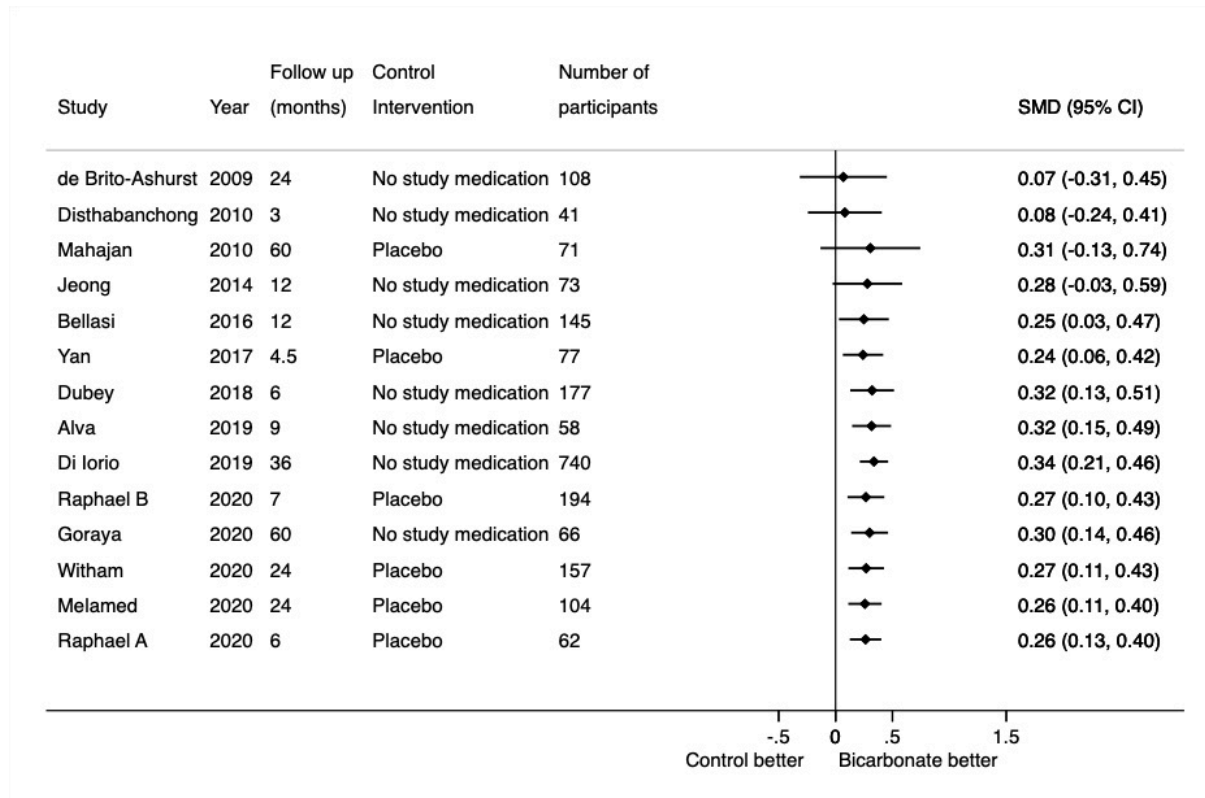

### Figure S5. Effect of bicarbonate therapy on change in eGFR

Forest plot showing the effect of bicarbonate therapy on change in eGFR (mL/min/1.73 m<sup>2</sup>) from baseline to last measurement

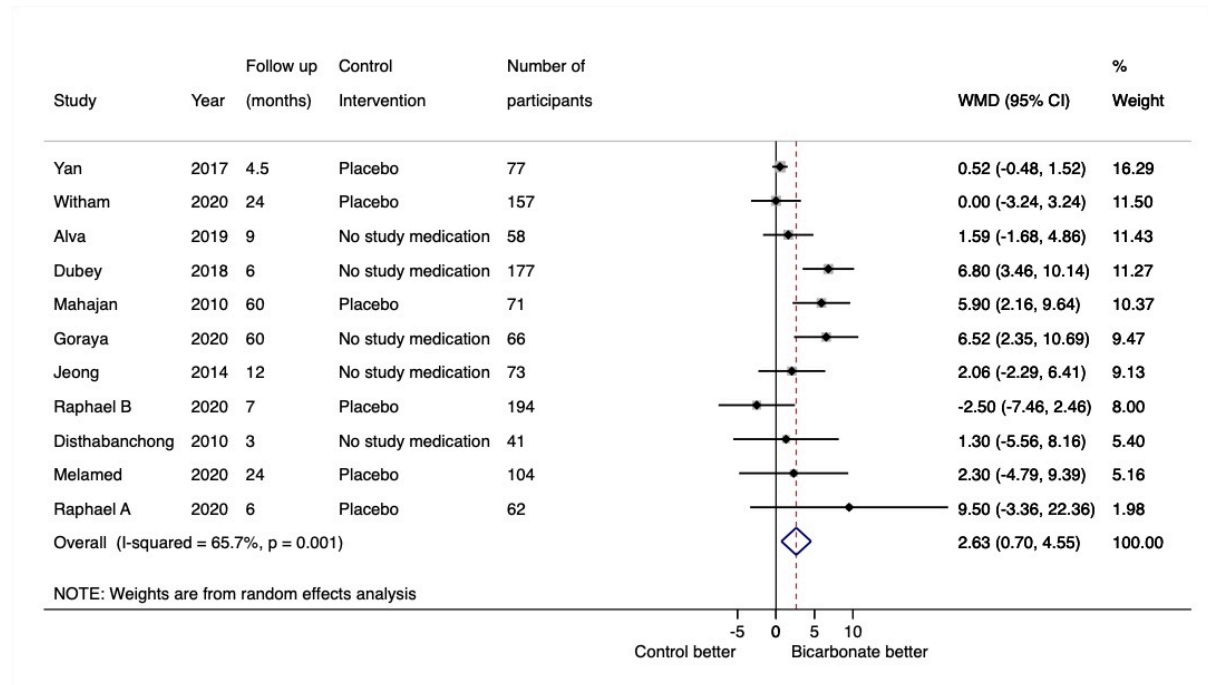

### Figure S6. Effect of bicarbonate therapy on change in creatinine clearance

Forest plot showing the effect of bicarbonate therapy on change in creatinine clearance from baseline to last measurement

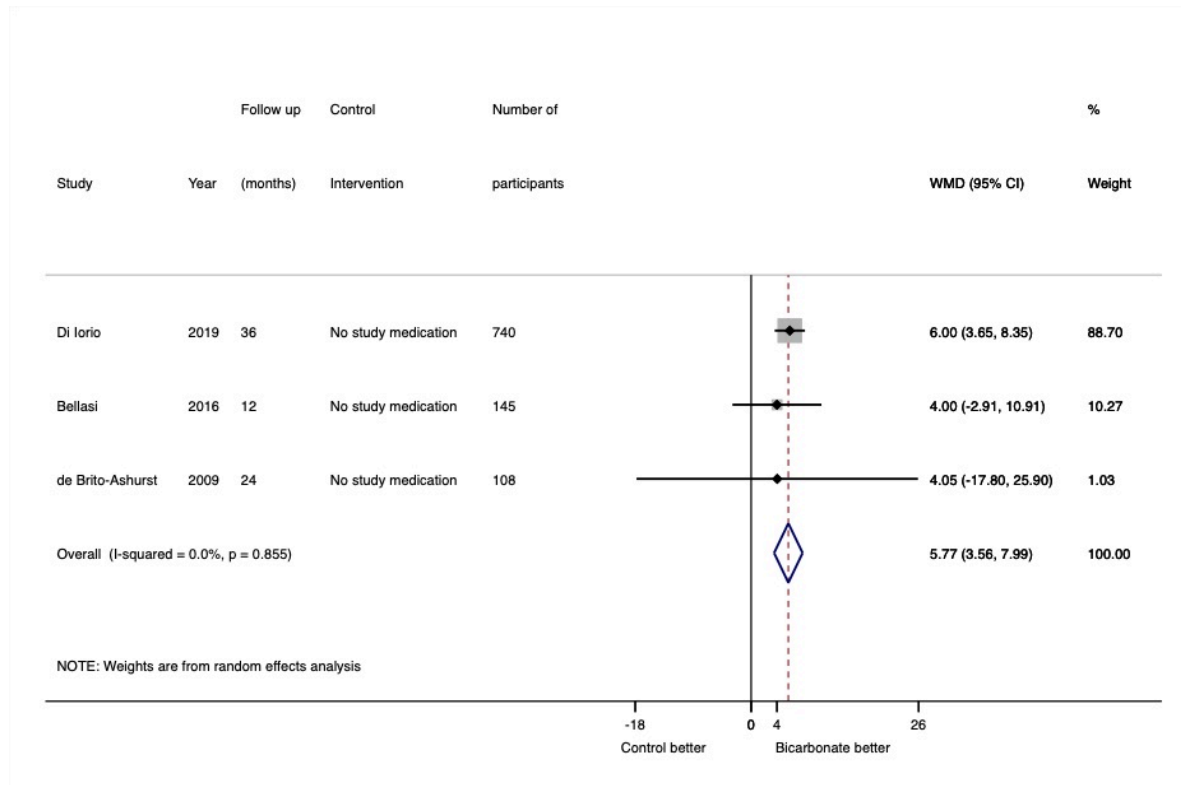



**Figure S7. Subgroup analysis of the effect of bicarbonate therapy on eGFR**

**(mL/min/1.73m<sup>2</sup>): according to the use of placebo or no study medication in the control arm.**

Forest plot showing subgroup analysis according to the use of placebo or no study medication on the effect of bicarbonate therapy on the change in eGFR. Interaction p-value 0.04.

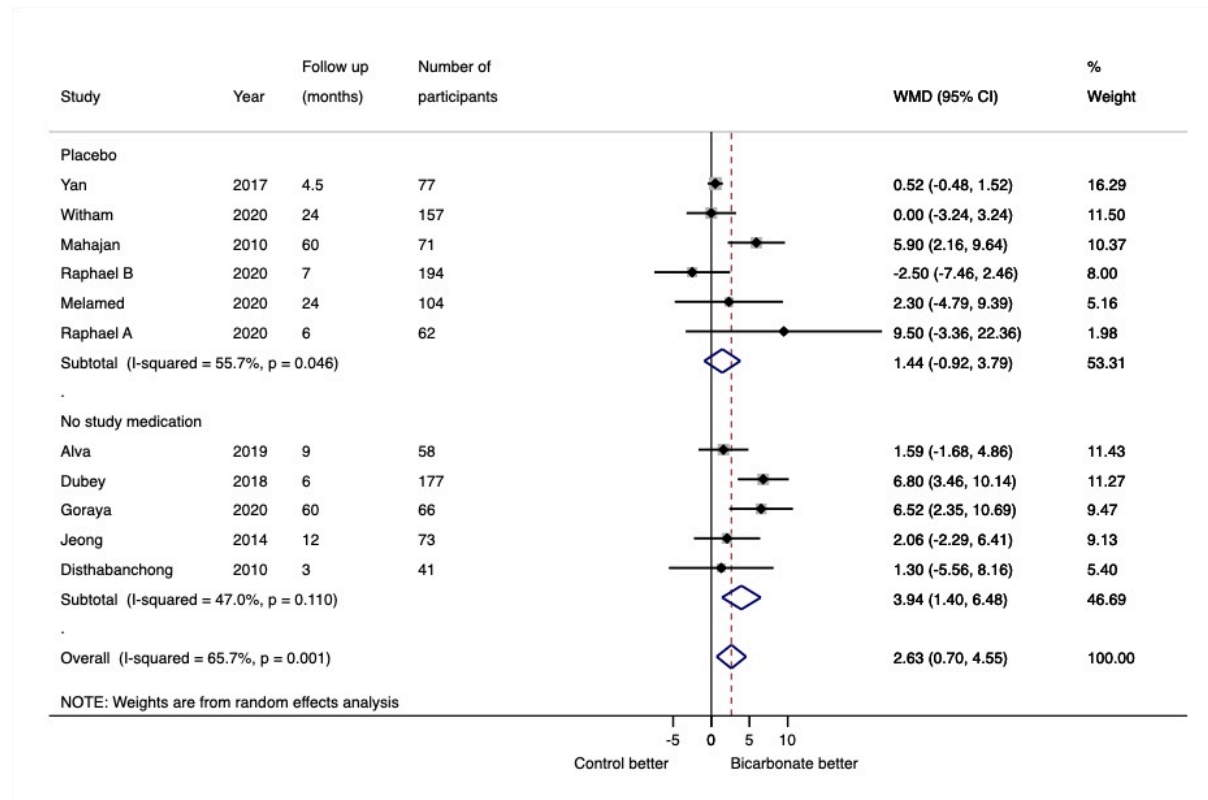

**Figure S8. Subgroup analysis of the effect of bicarbonate therapy on eGFR**

**(mL/min/1.73m<sup>2</sup>): according to follow-up time.**

Forest plot showing subgroup analysis according to follow up time less or more than 12 months on the effect of bicarbonate therapy on the change in eGFR. Interaction p-value 0.03

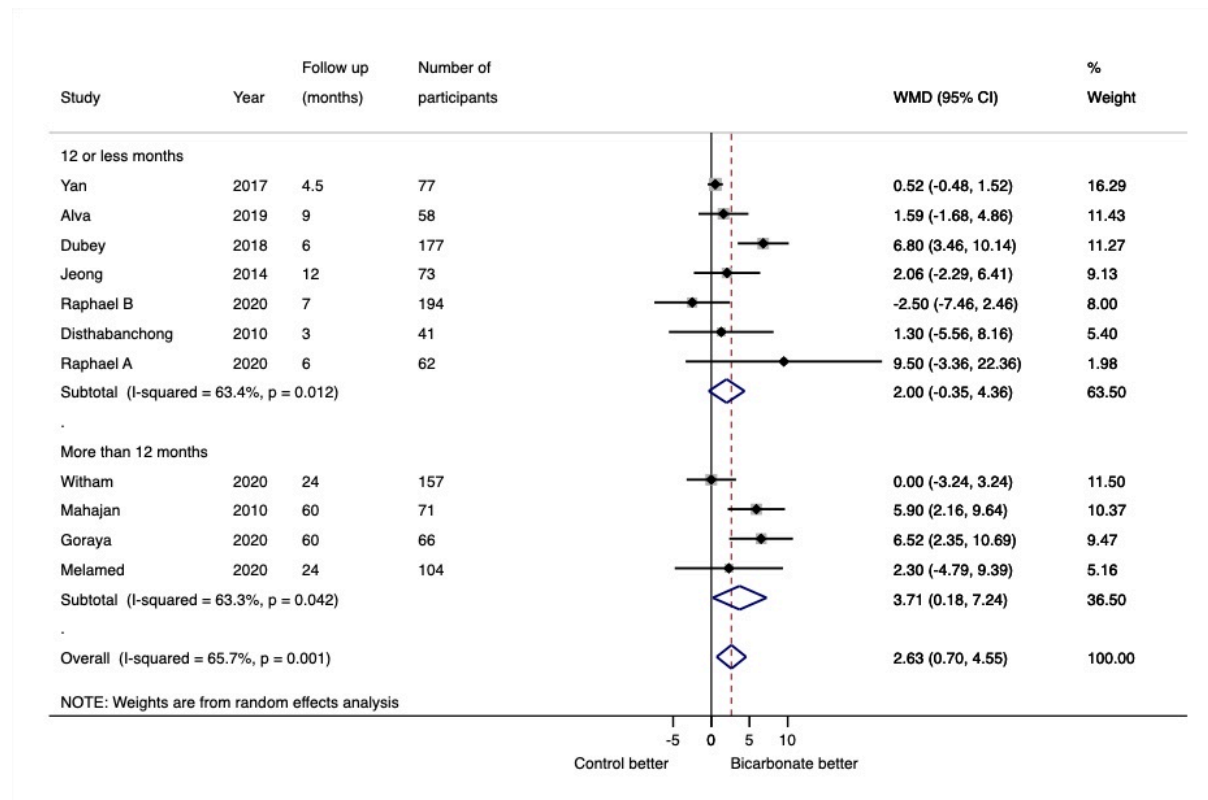

**Figure S9. Subgroup analysis of the effect of bicarbonate therapy on eGFR (mL/min/1.73m<sup>2</sup>): according to trial quality.**

Forest plot showing subgroup analysis according to trial quality on the effect of bicarbonate therapy on the change in eGFR. Interaction p-value 0.19

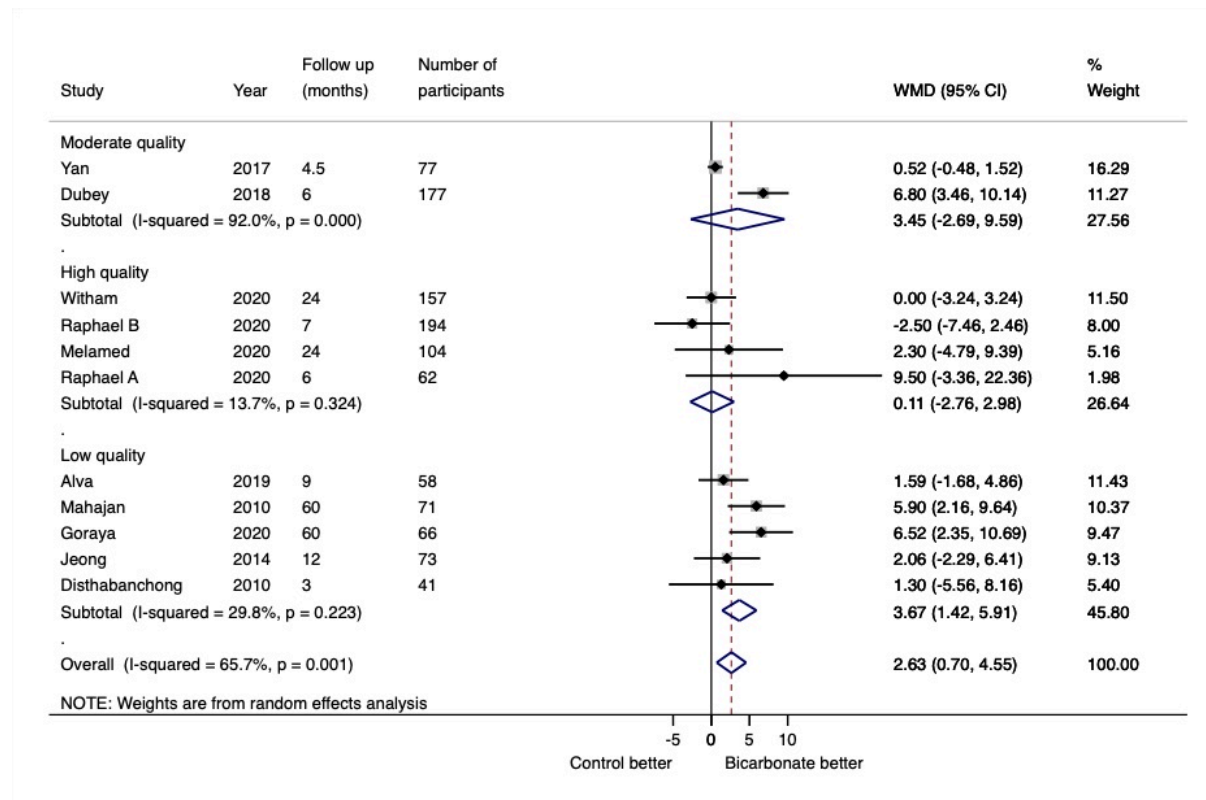

**Figure S10. Effect of bicarbonate therapy on change in serum creatinine**

Forest plot showing the effect of bicarbonate therapy on change in serum creatinine (mg/dL) from baseline to last measurement

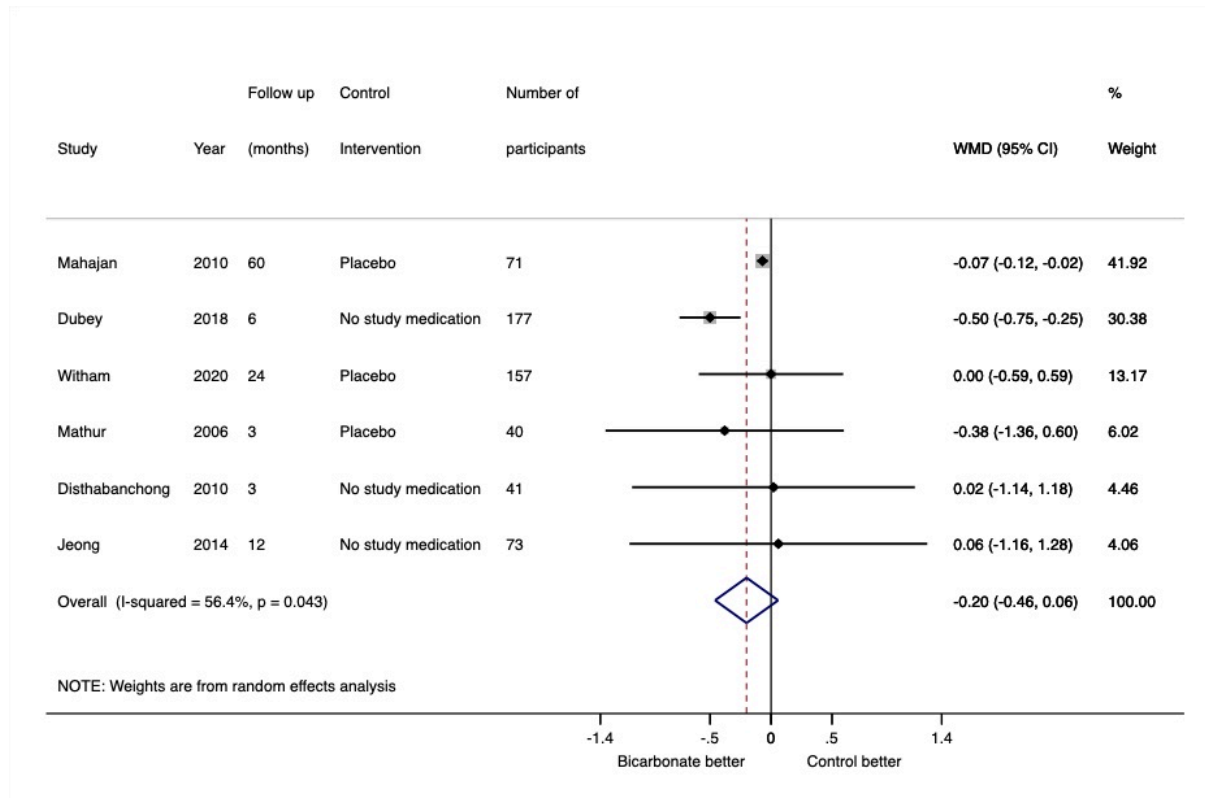

**Figure S11. Subgroup analysis of the effect of bicarbonate therapy on progression to kidney failure 1: according to the use of placebo or no study medication in the control arm.**

Forest plot showing subgroup analysis according to the use of placebo or no study medication on the effect of bicarbonate therapy on progression to kidney failure. Interaction p-value 0.04.

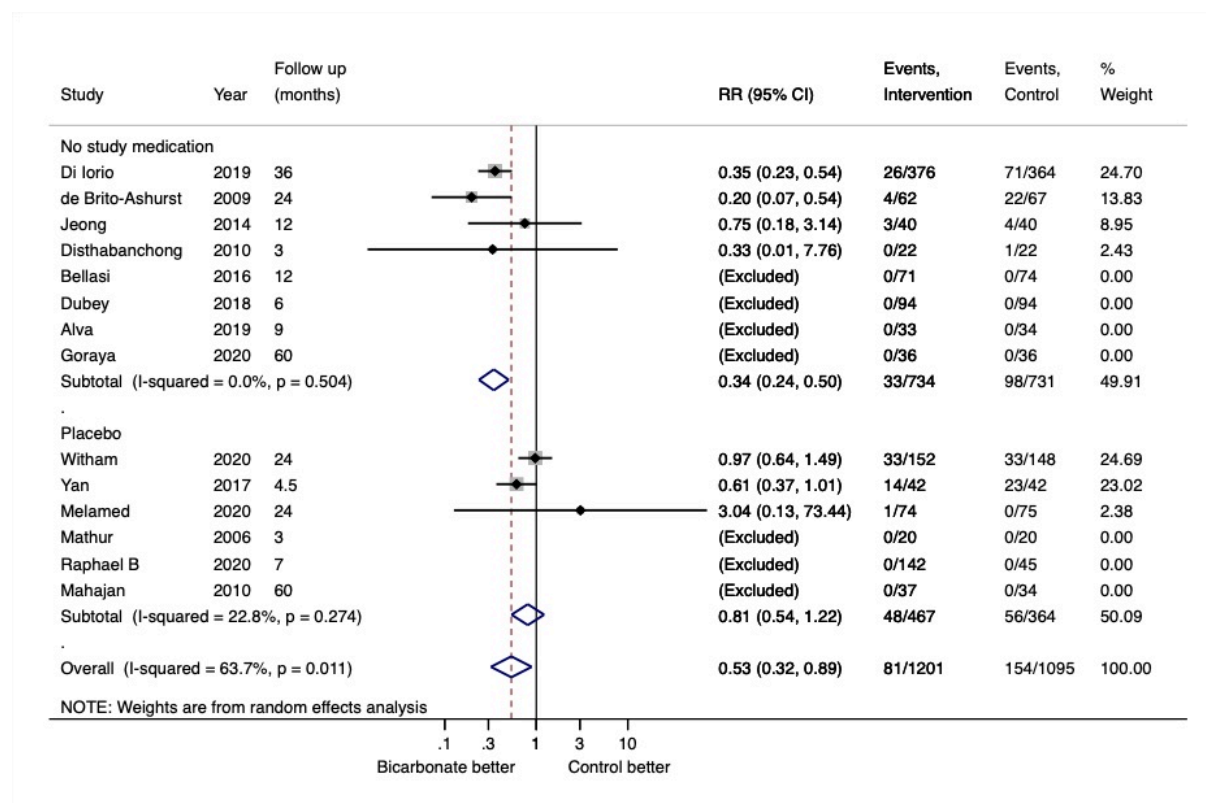

**Figure S12. Subgroup analysis of the effect of bicarbonate therapy on the progression to kidney failure 2: according to follow-up time.**

Forest plot showing subgroup analysis according to follow up time less or more than 12 months on the effect of bicarbonate therapy on the progression to kidney failure. Interaction p-value 0.73.

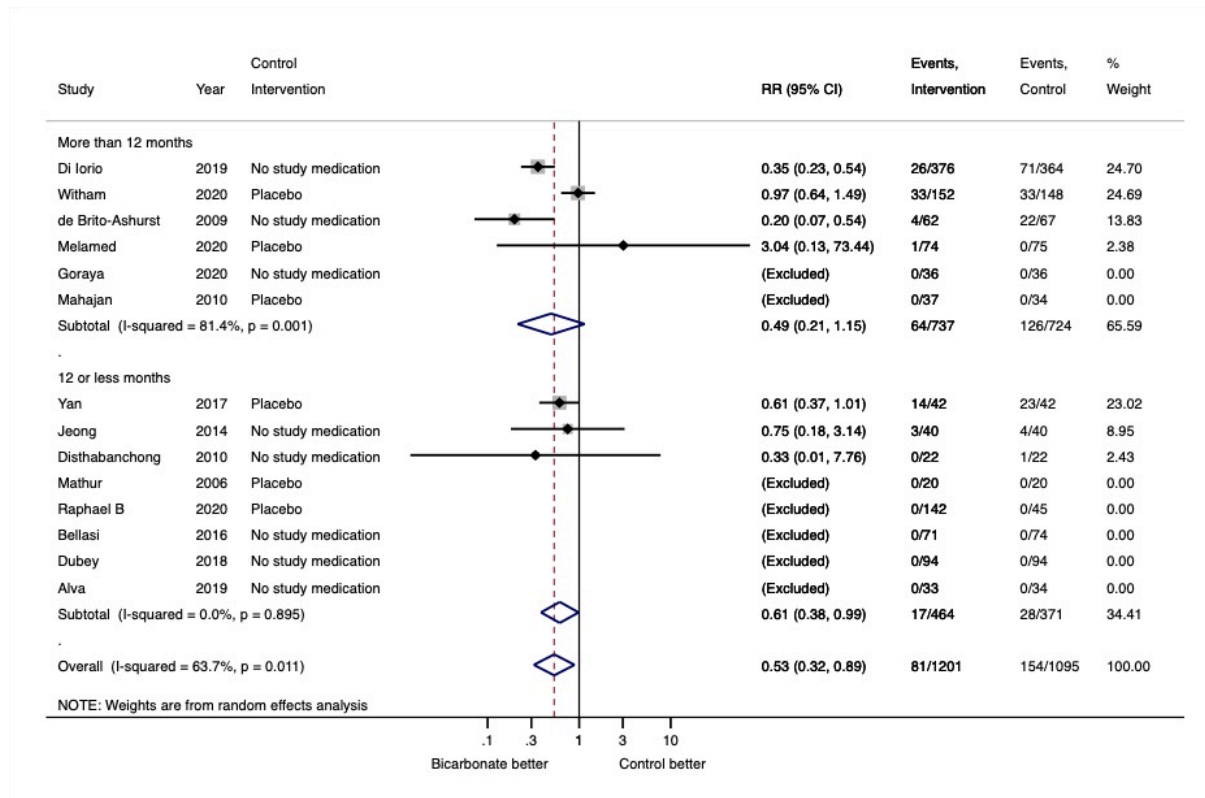

**Figure S13. Subgroup analysis of the effect of bicarbonate therapy on the progression to kidney failure 3: according to trial quality.**

Forest plot showing subgroup analysis according to trial quality on the effect of bicarbonate therapy on the progression to kidney failure. Interaction p-value 0.24.

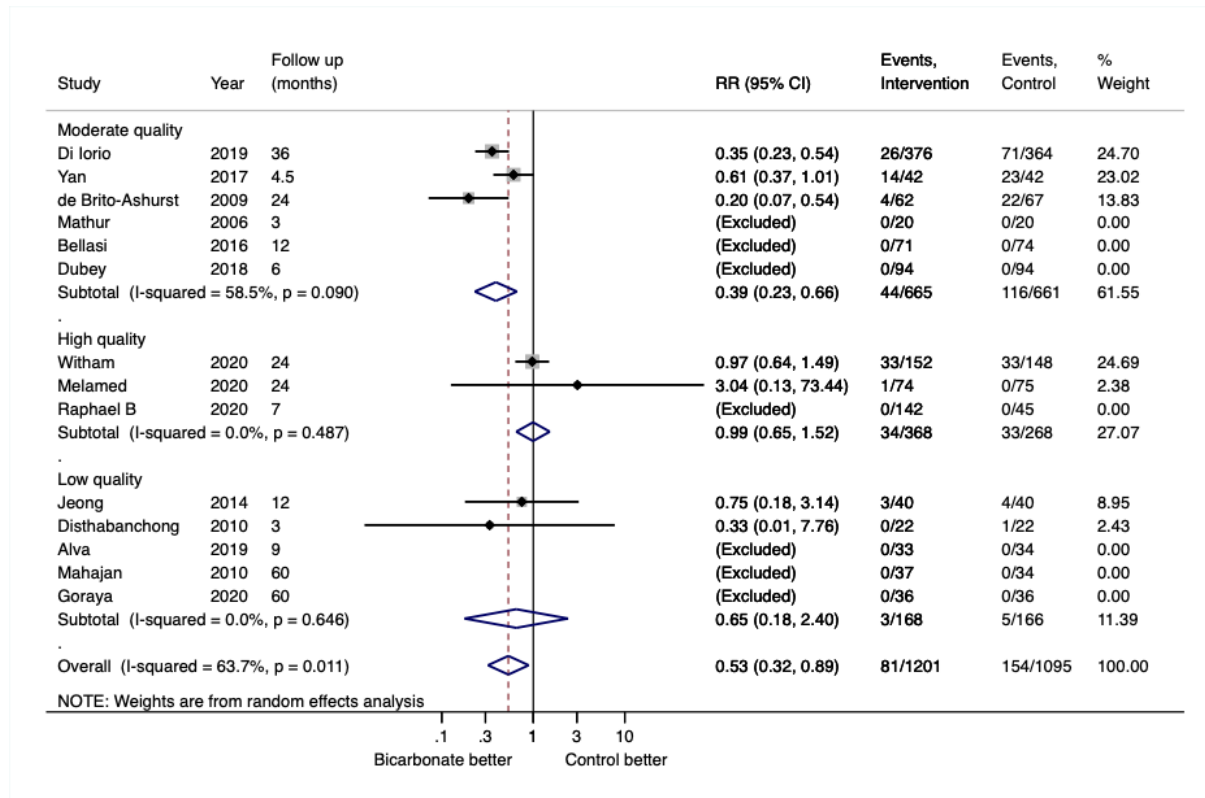

**Figure S14. Effect of bicarbonate therapy on rapid decline in kidney function**

Forest plot showing the effect of bicarbonate therapy on change in rapid decline in kidney function

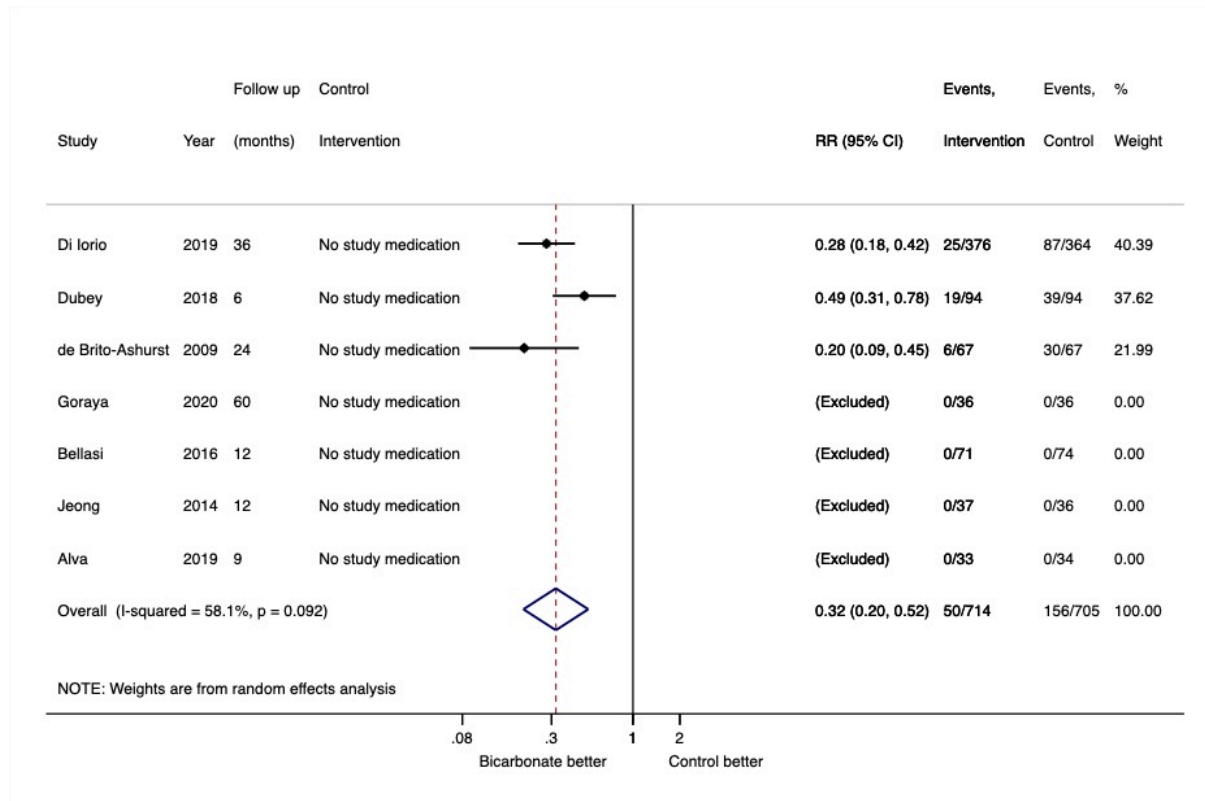



**Figure S15. Effect of bicarbonate therapy on change in proteinuria**

Forest plot showing the effect of bicarbonate therapy on change in proteinuria from baseline to last measurement

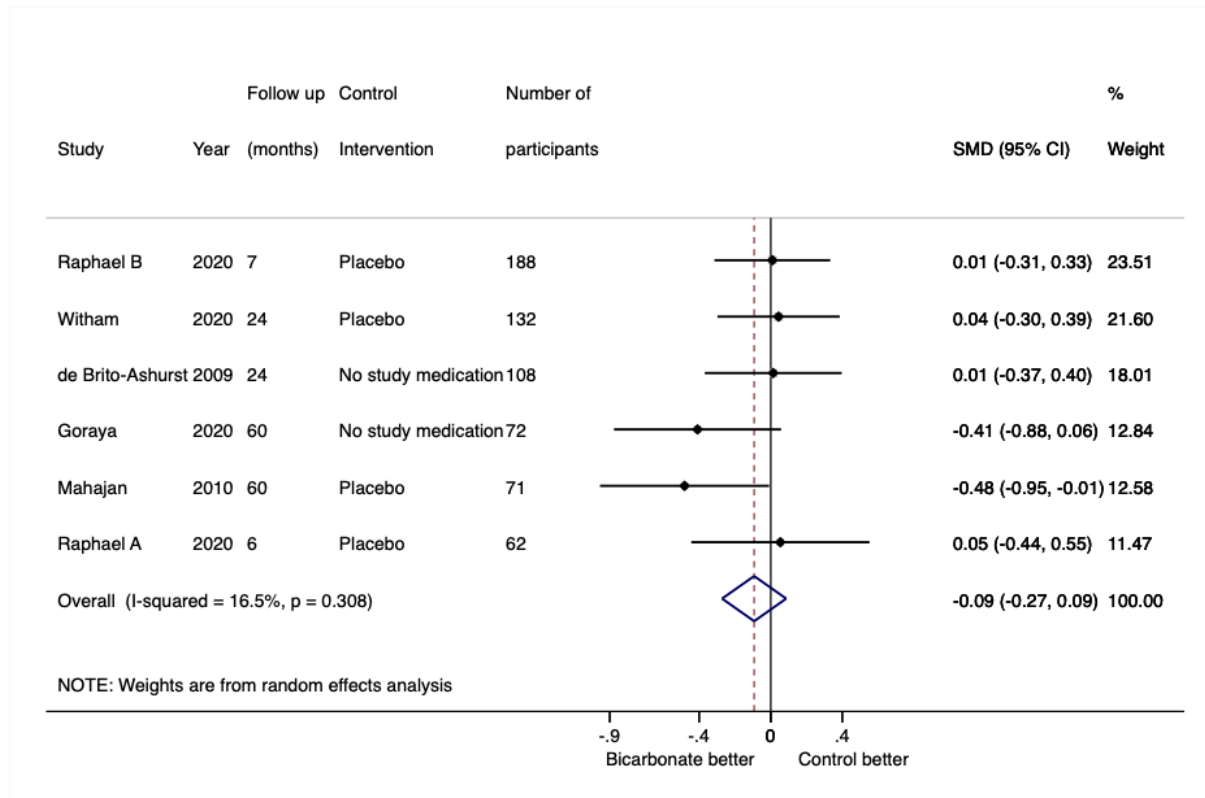

**Figure S16. Effect of bicarbonate therapy on change in serum bicarbonate**

Forest plot showing the effect of bicarbonate therapy on change in serum bicarbonate

(mmol/L) from baseline to last measurement

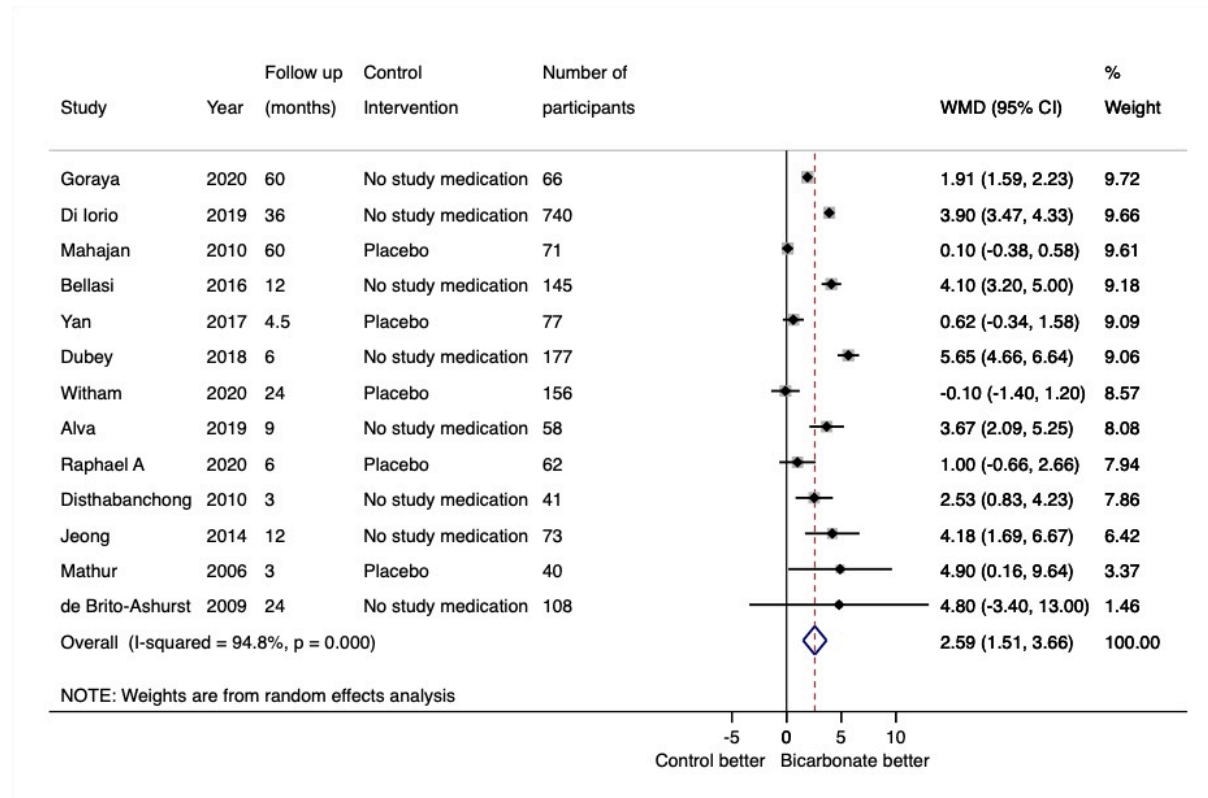

**Figure S17. Subgroup analysis of the effect of bicarbonate therapy on serum bicarbonate (mmol/L)1: according to the use of placebo or no study medication in the control arm.**

Forest plot showing subgroup analysis according to the use of placebo or no study medication on the effect of bicarbonate therapy on change in serum bicarbonate. Interaction p-value 0.001.

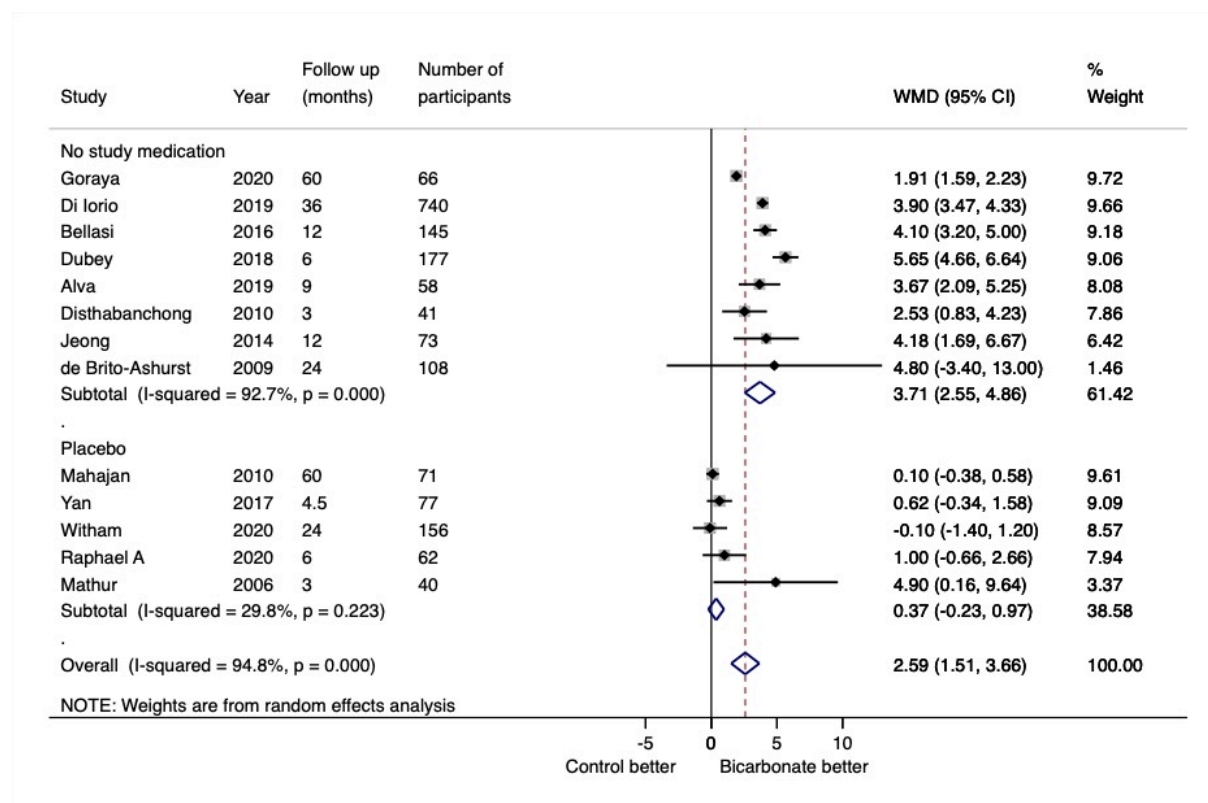

**Figure S18. Subgroup analysis of the effect of bicarbonate therapy on serum bicarbonate (mmol/L) 2: according to follow-up time.**

Forest plot showing subgroup analysis according to follow up time less or more than 12 months on the effect of bicarbonate therapy on change in serum bicarbonate. Interaction p-value 0.1

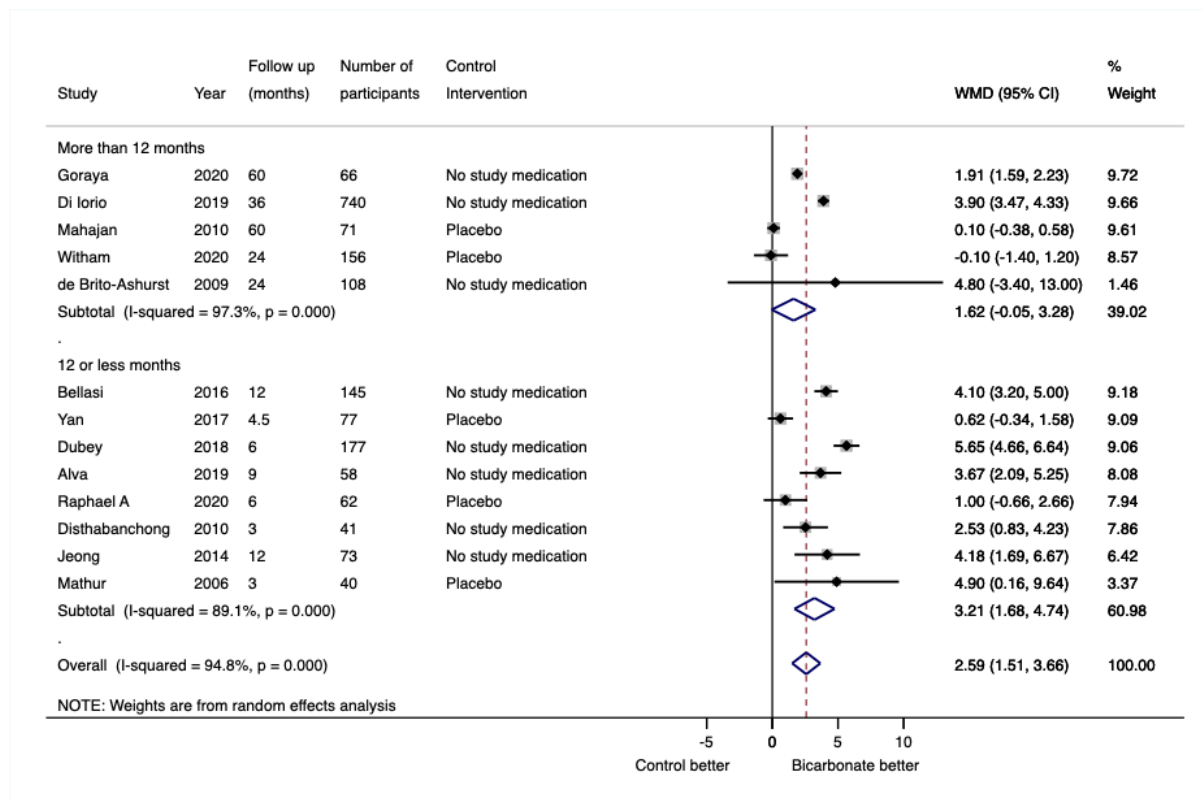

**Figure S19. Subgroup analysis of the effect of bicarbonate therapy on serum bicarbonate (mmol/L) 3: according to trial quality.**

Forest plot showing subgroup analysis according to trial quality on the effect of bicarbonate therapy on change in serum bicarbonate. Interaction p-value 0.58

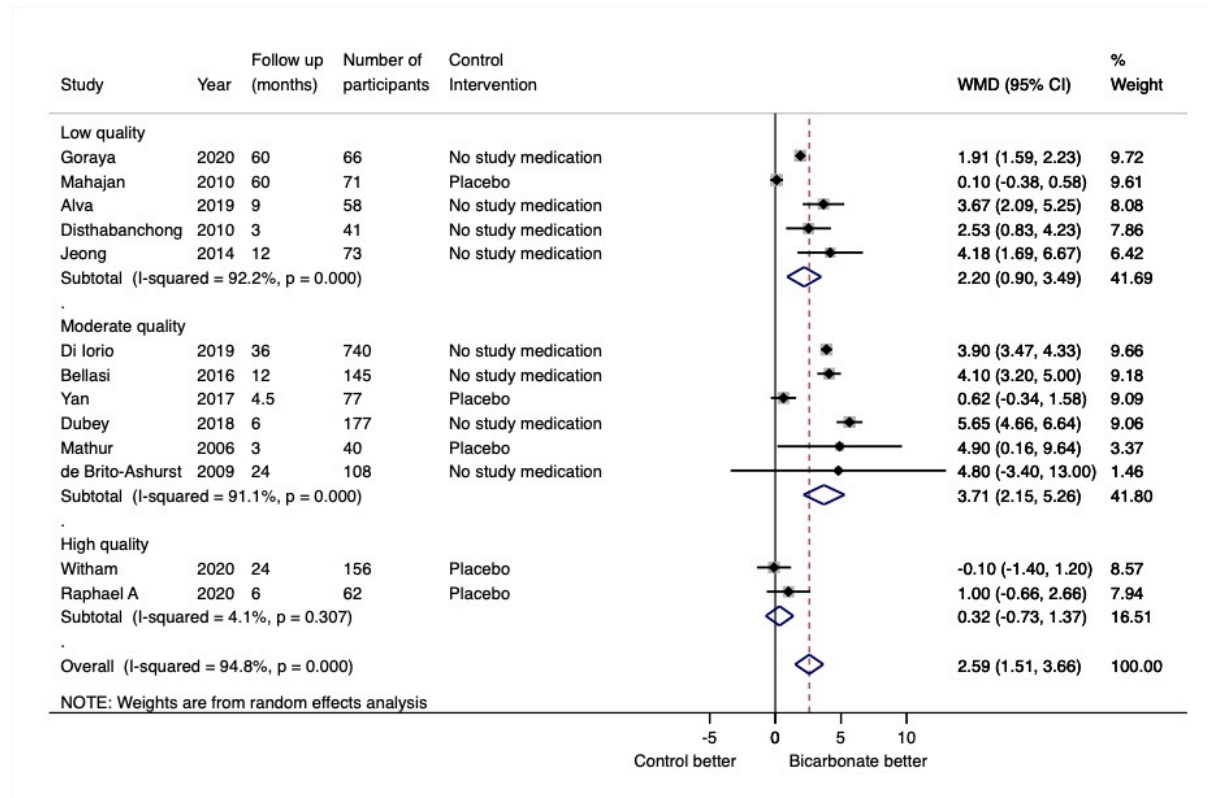

### Figure S20. Effect of bicarbonate therapy on change in systolic blood pressure

Forest plot showing the effect of bicarbonate therapy on change in systolic blood pressure (mm Hg) from baseline to last measurement

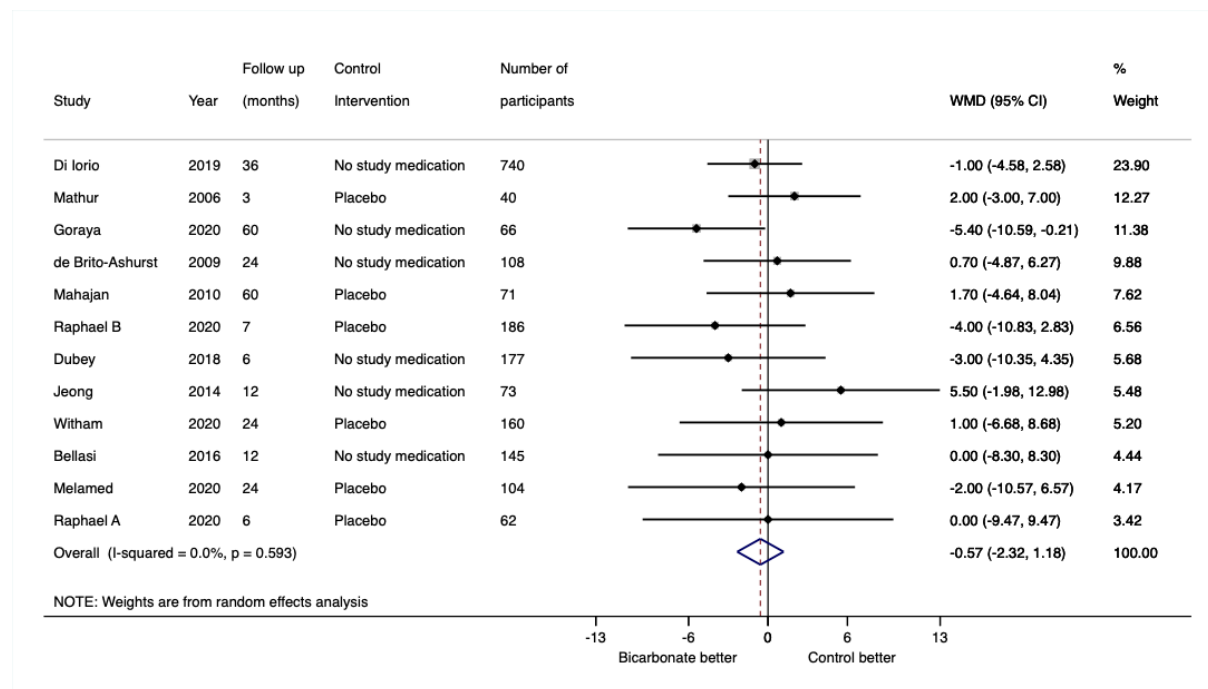

**Figure S21. Effect of bicarbonate therapy on change in diastolic blood pressure**

Forest plot showing the effect of bicarbonate therapy on change in diastolic blood pressure (mm Hg) from baseline to last measurement

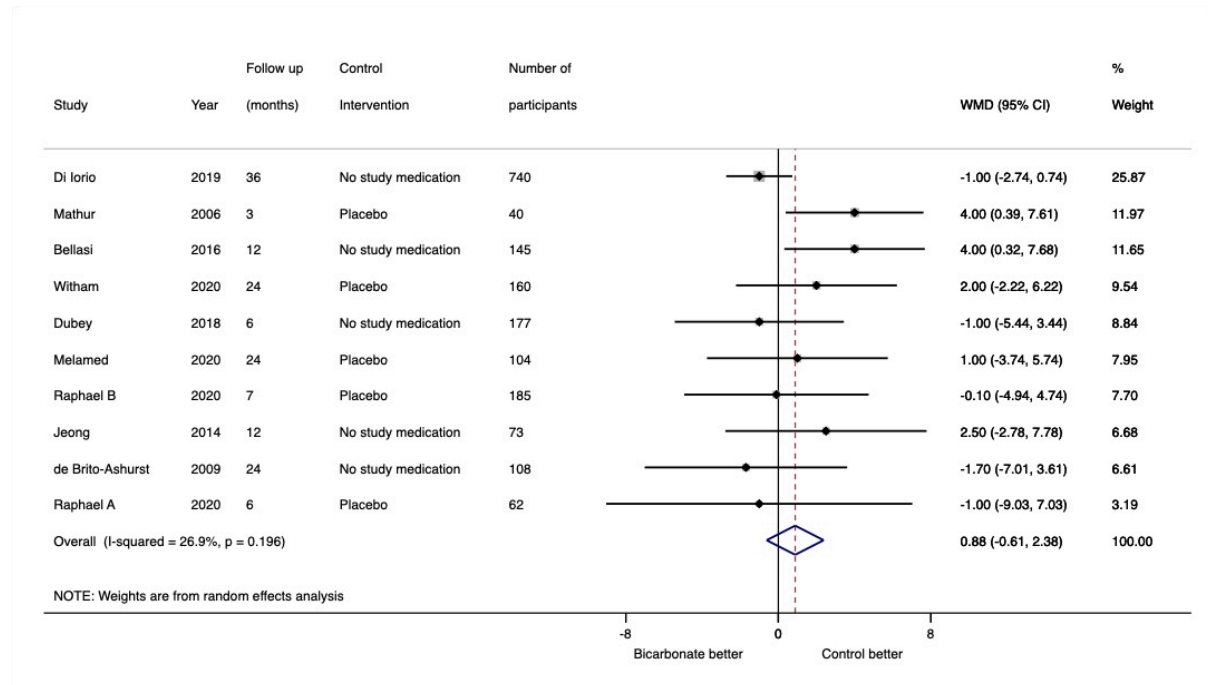

**Figure S22. Effect of bicarbonate therapy on worsening of blood pressure**

Forest plot showing the effect of bicarbonate therapy on worsening of blood pressure

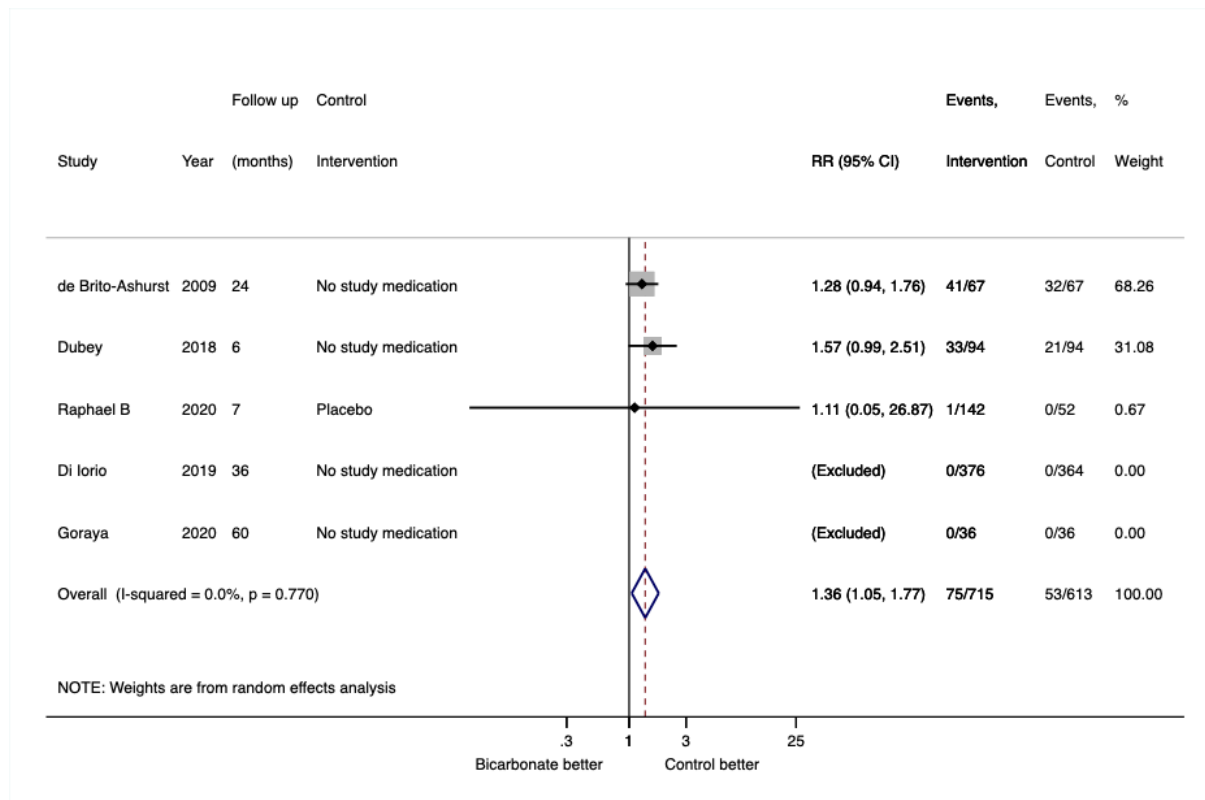



**Figure S23. Effect of bicarbonate therapy on worsening of edema**

Forest plot showing the effect of bicarbonate therapy on worsening of edema

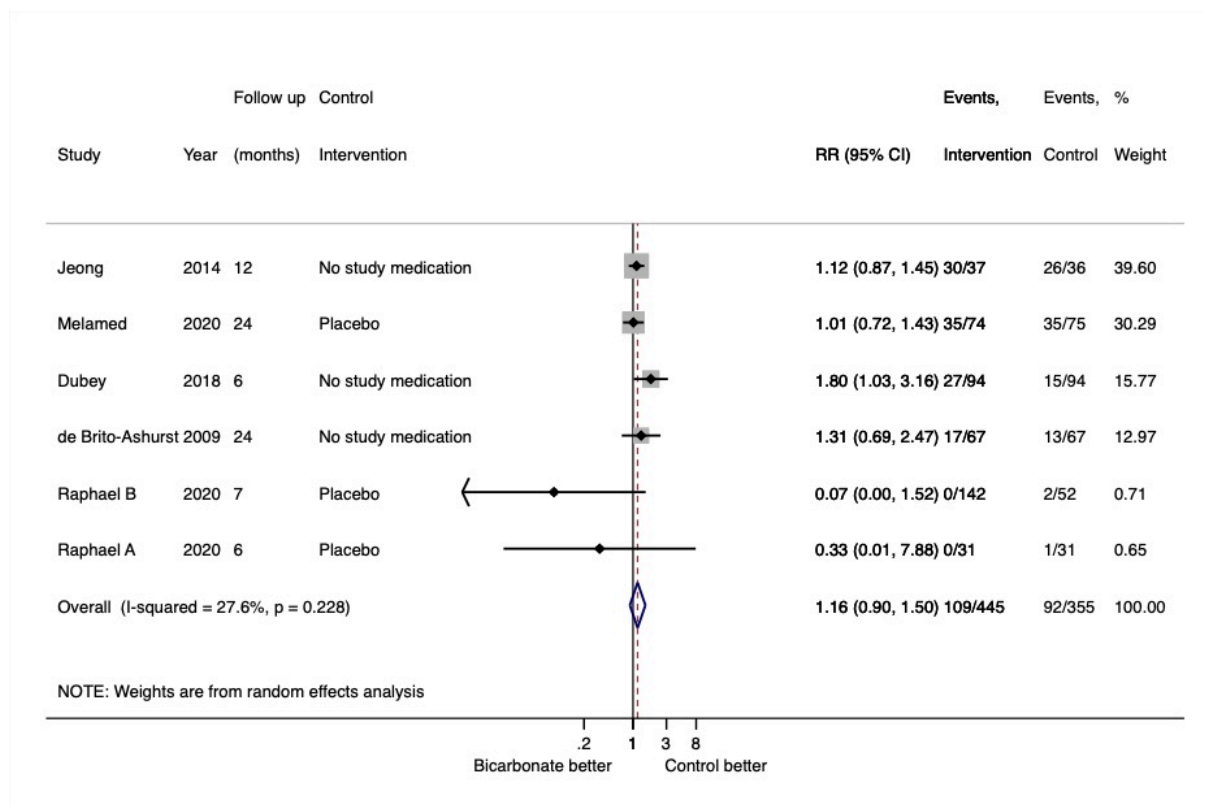

**Figure S24. Effect of bicarbonate therapy on change in body weight**

Forest plot showing the effect of bicarbonate therapy on change in body weight (kg) from baseline to last measurement

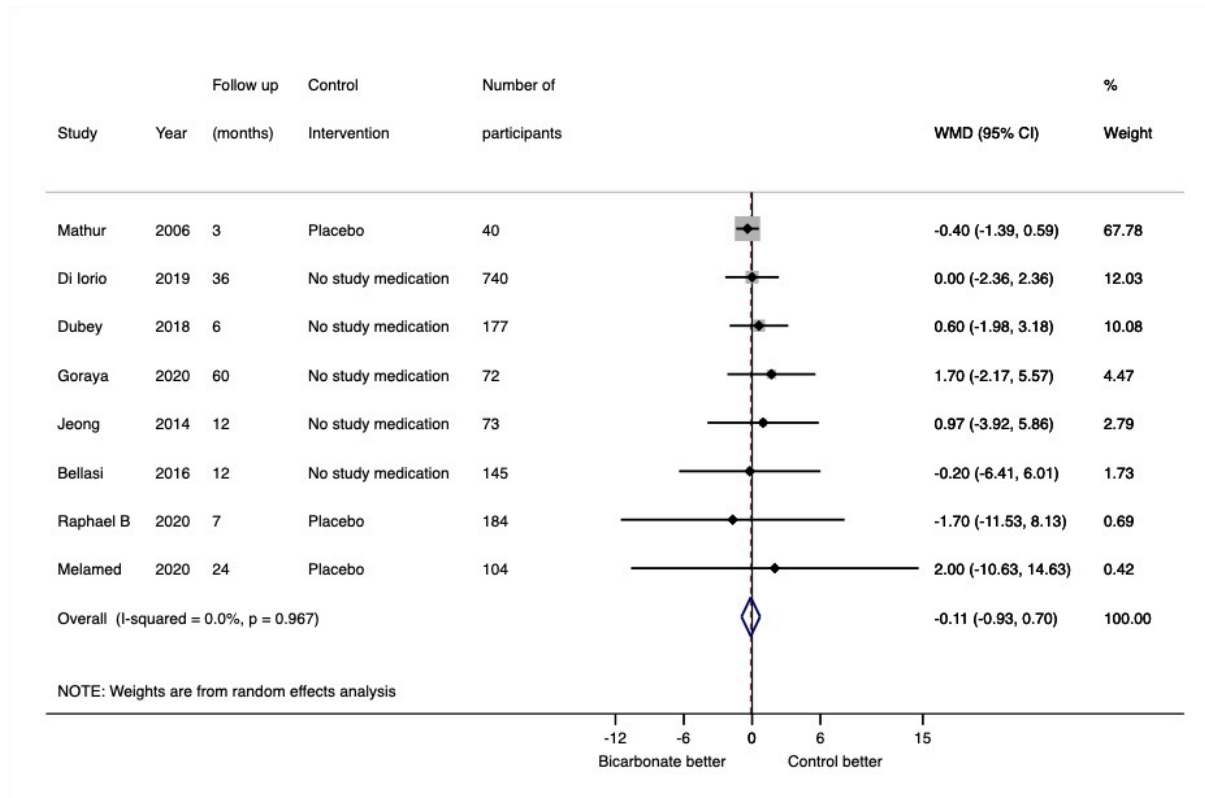

**Figure S25. Effect of bicarbonate therapy on all-cause mortality**

Forest plot showing the effect of bicarbonate therapy on change in all cause mortality

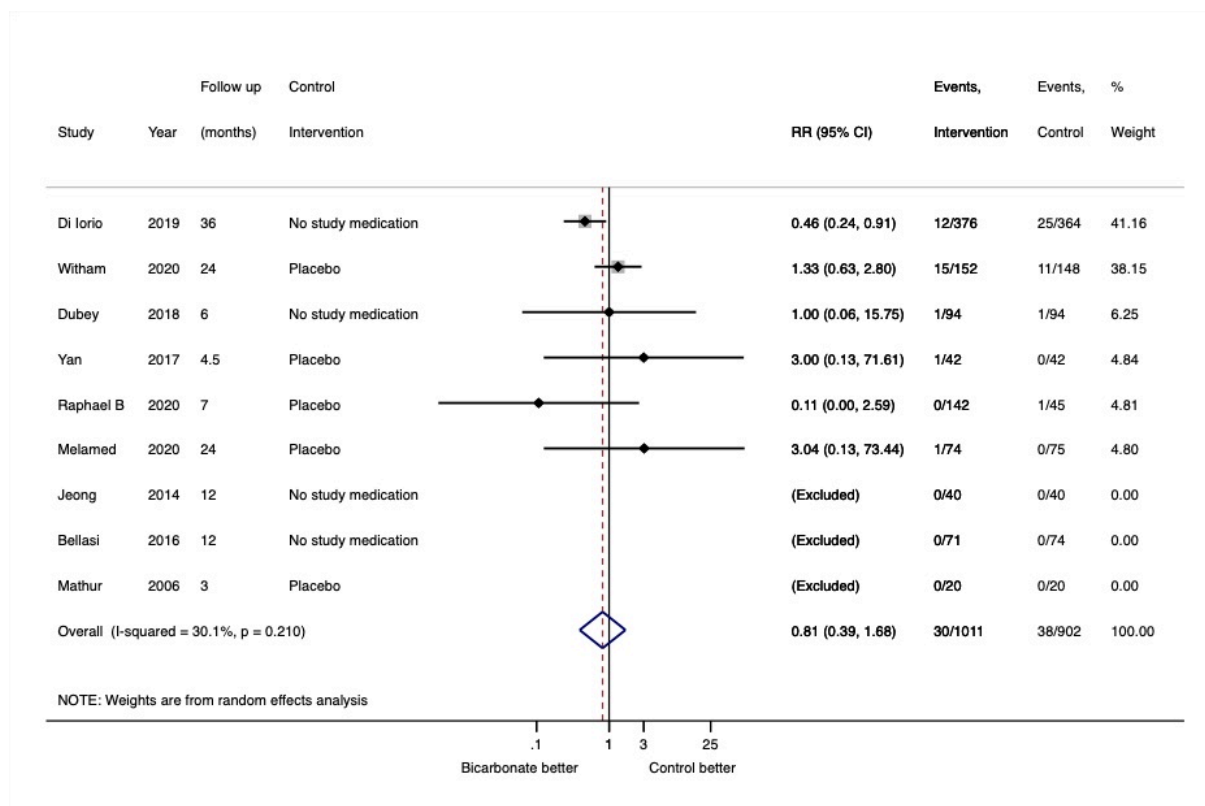

**Figure S26. Effect of bicarbonate therapy on admissions for heart failure**

Forest plot showing the effect of bicarbonate therapy on change in hospital admission rate for heart failure

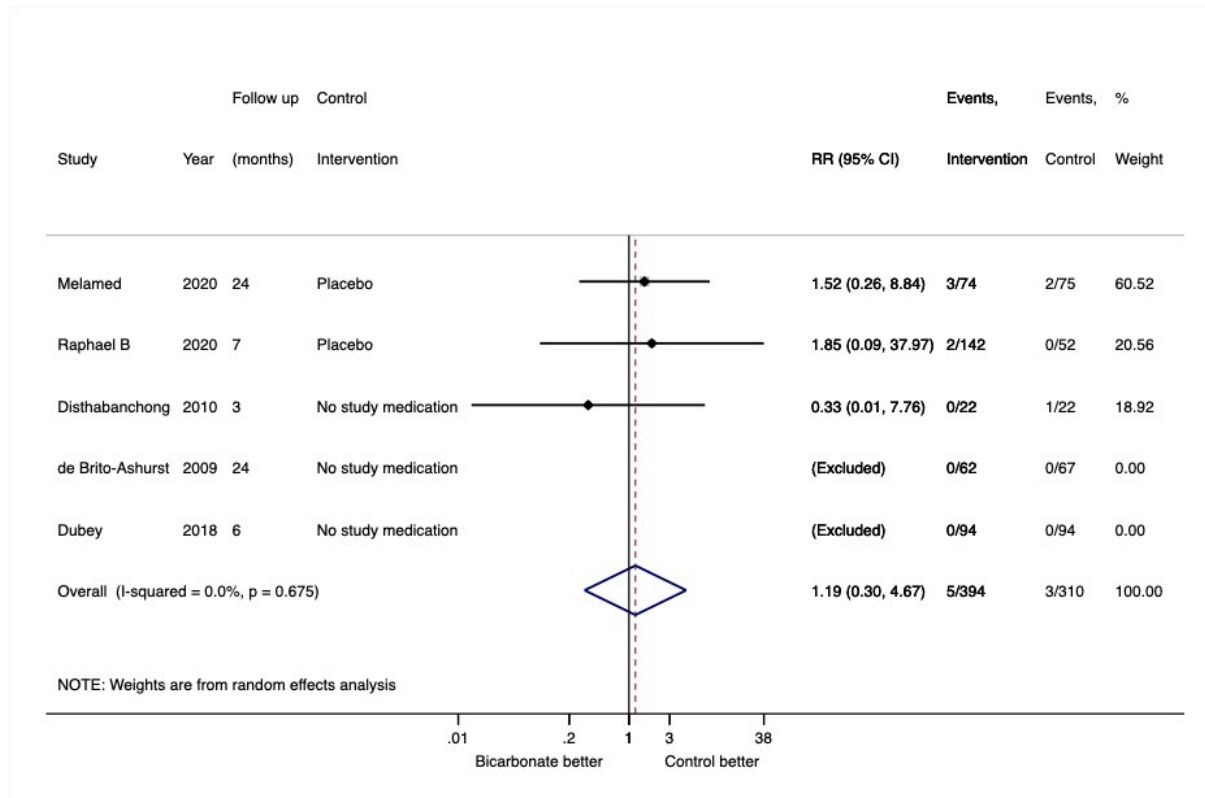

Figure S27. Funnel plot of effect of bicarbonate therapy on kidney function

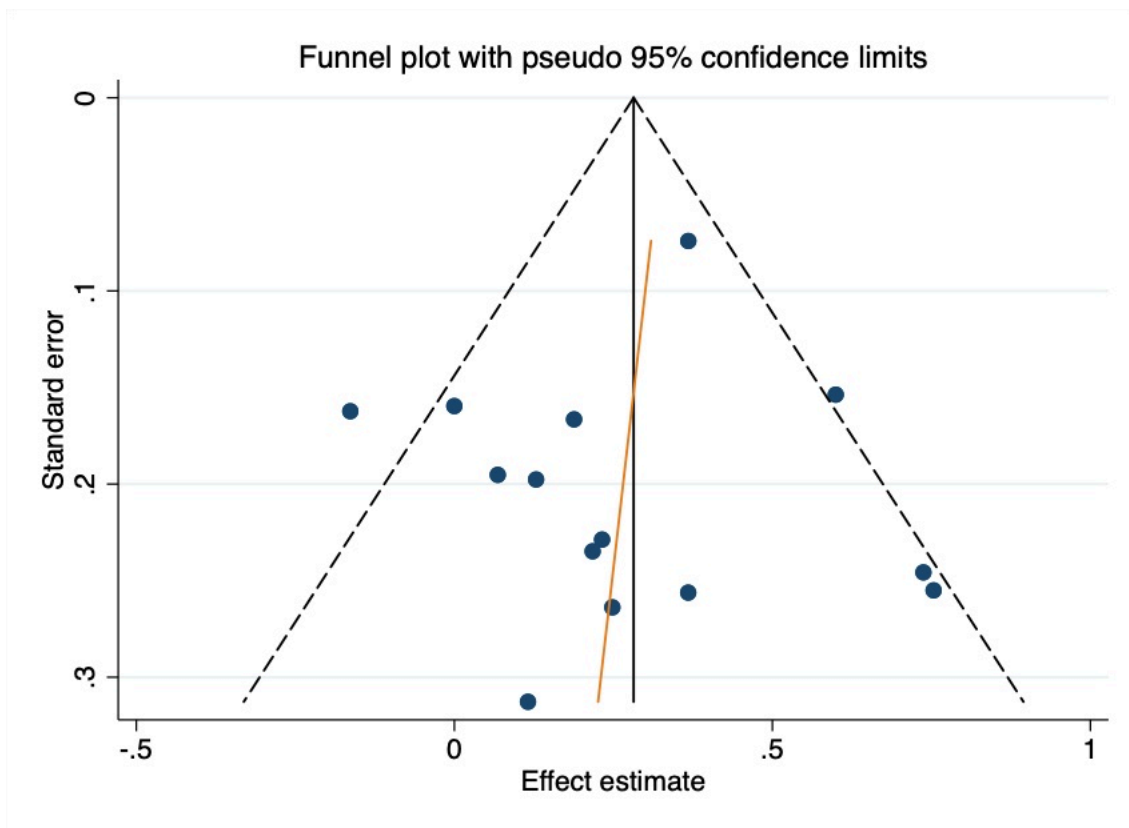

**Figure S28. Funnel plot of effect of bicarbonate therapy on the progression to kidney failure**

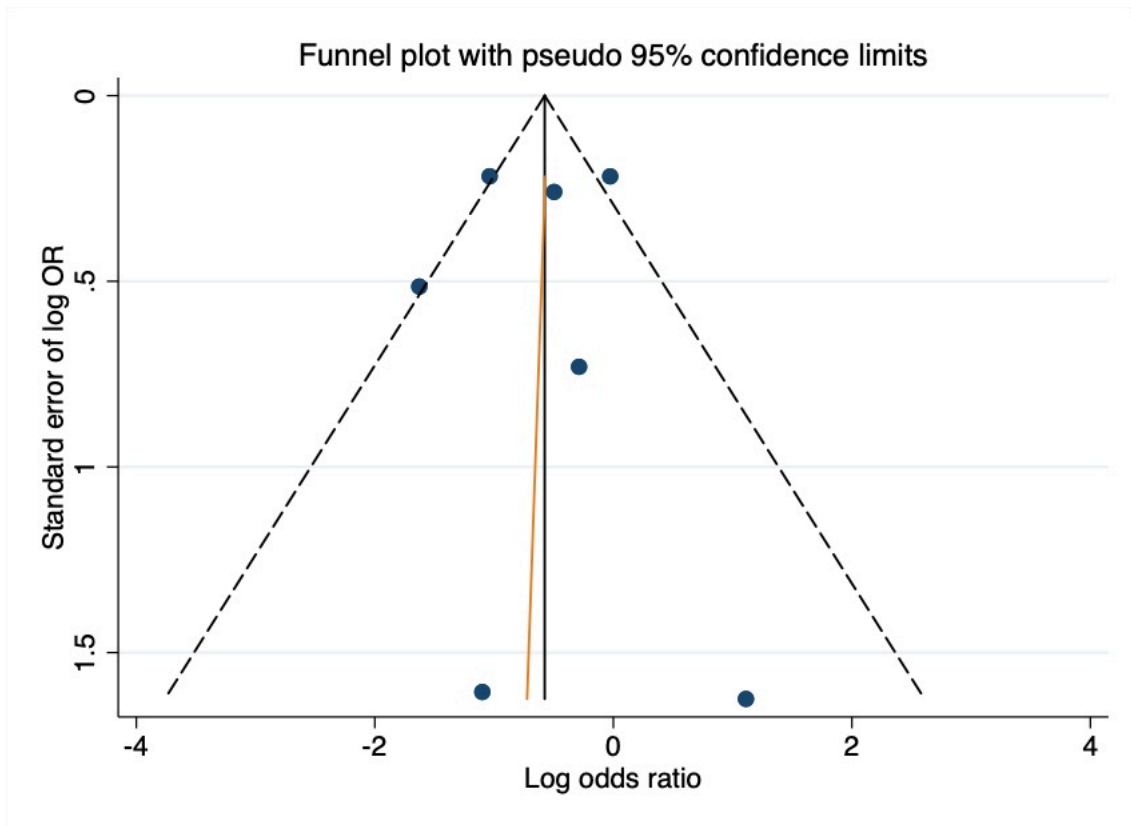

Figure S29. Funnel plot of the effect of bicarbonate therapy on eGFR (mL/min/1.73m<sup>2</sup>)

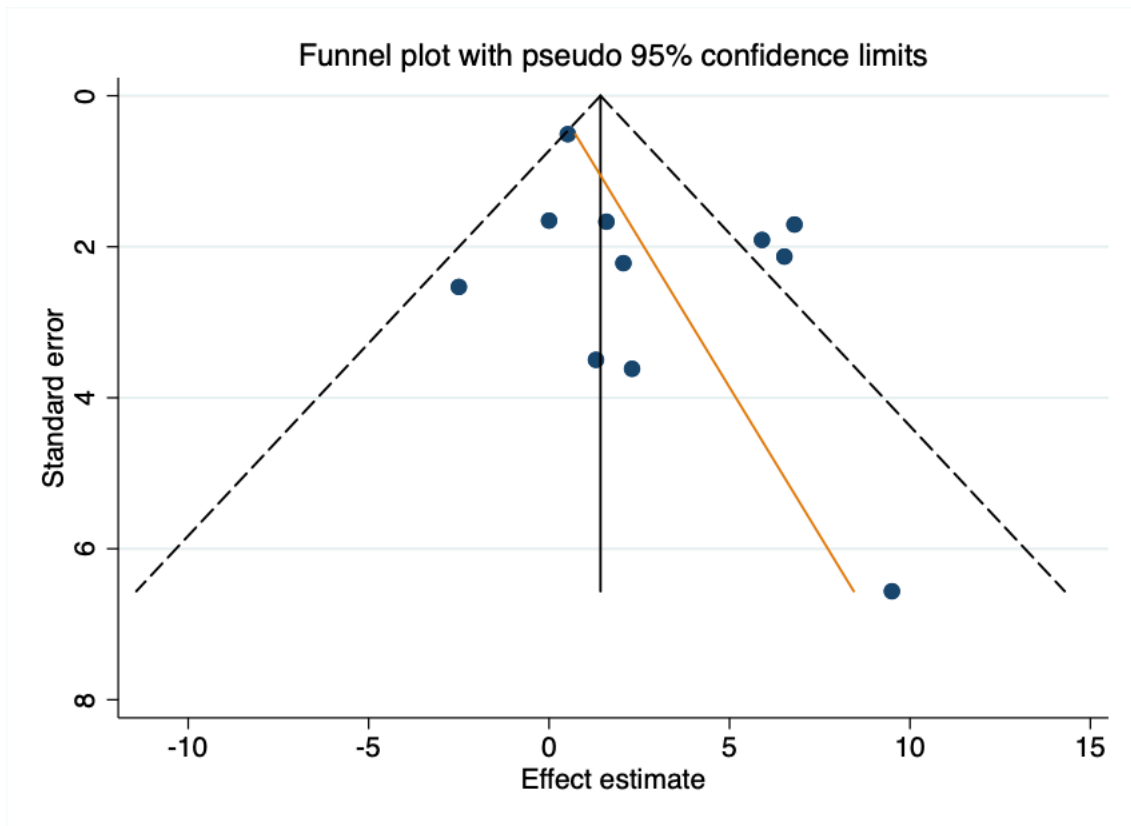

**Figure S30. Funnel plot of the effect of bicarbonate therapy on serum bicarbonate**

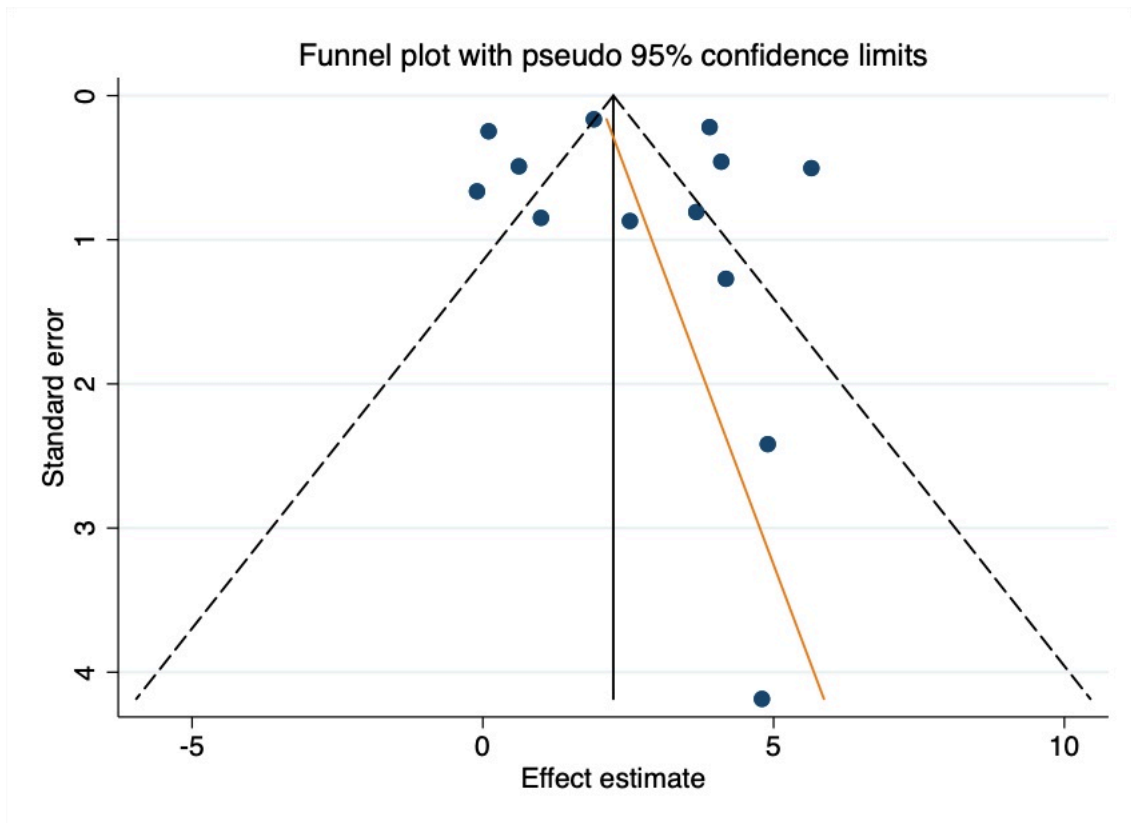



Figure S31. Funnel plot of the effect of bicarbonate therapy on weight (kg)

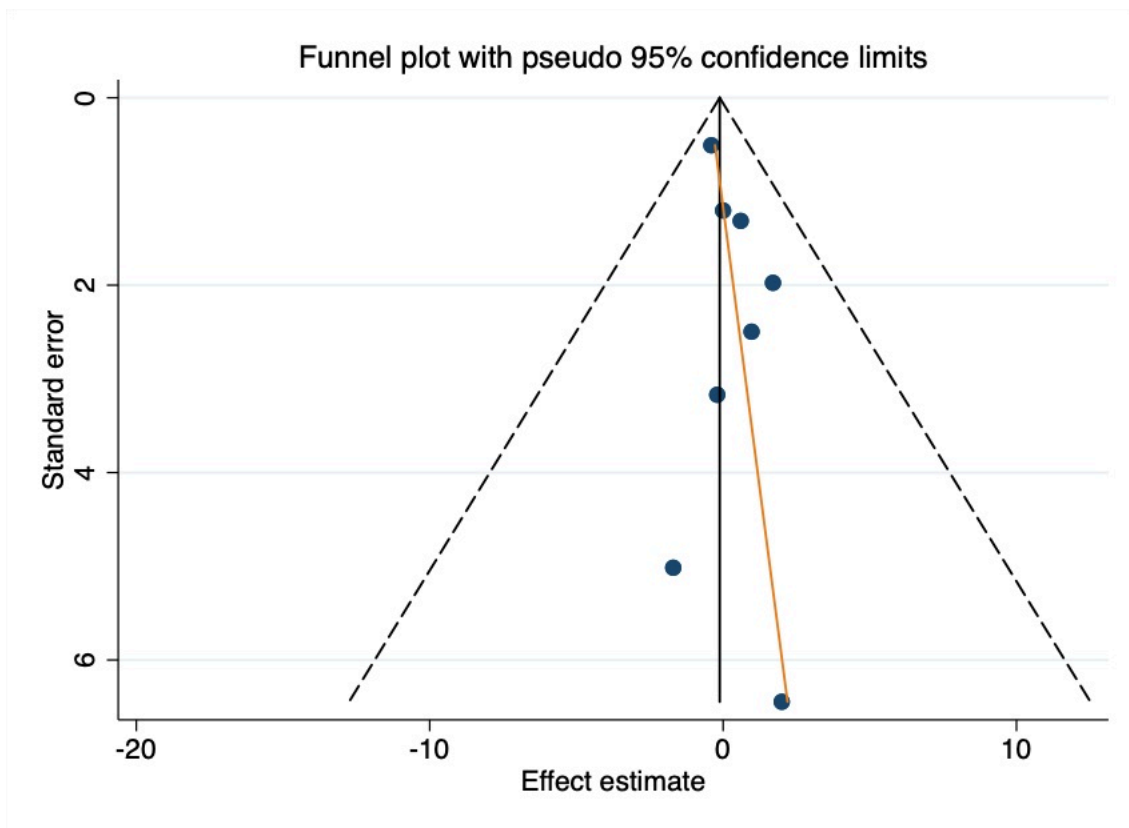

Figure S32. Funnel plot of the effect of bicarbonate therapy on systolic blood pressure

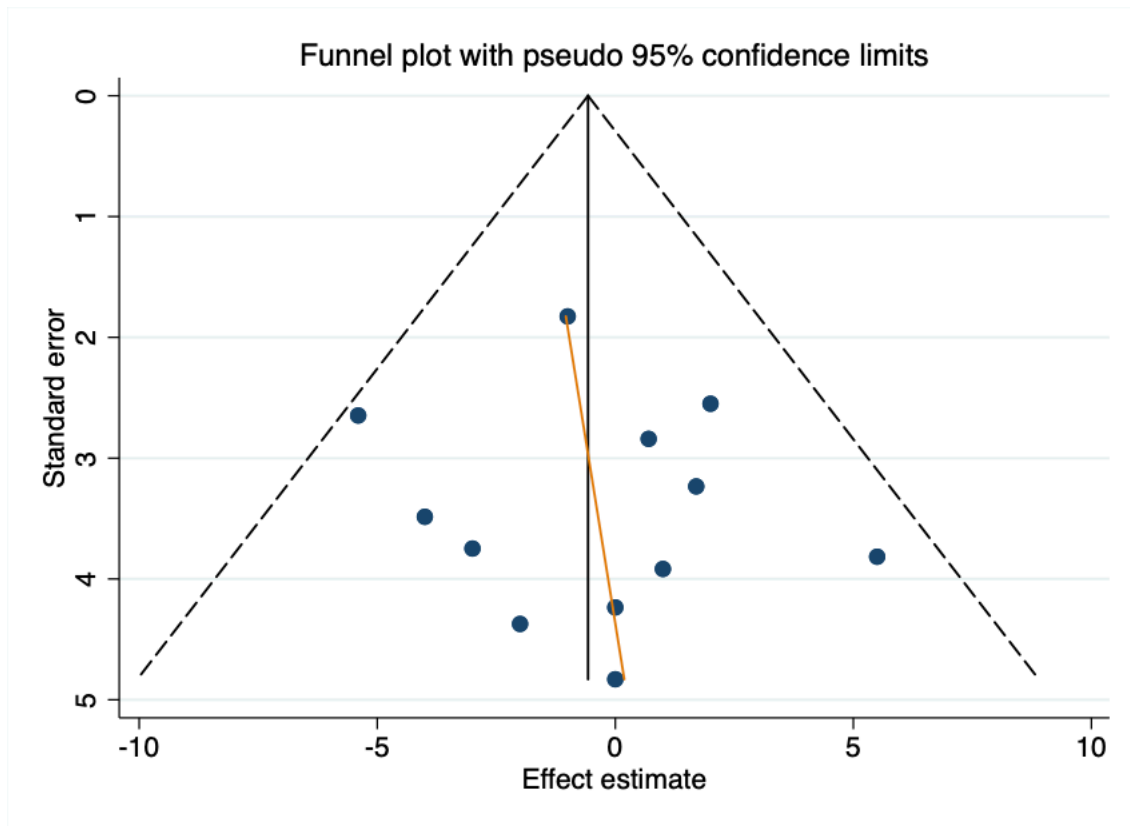

Figure S33. Funnel plot of the effect of bicarbonate therapy on diastolic blood pressure

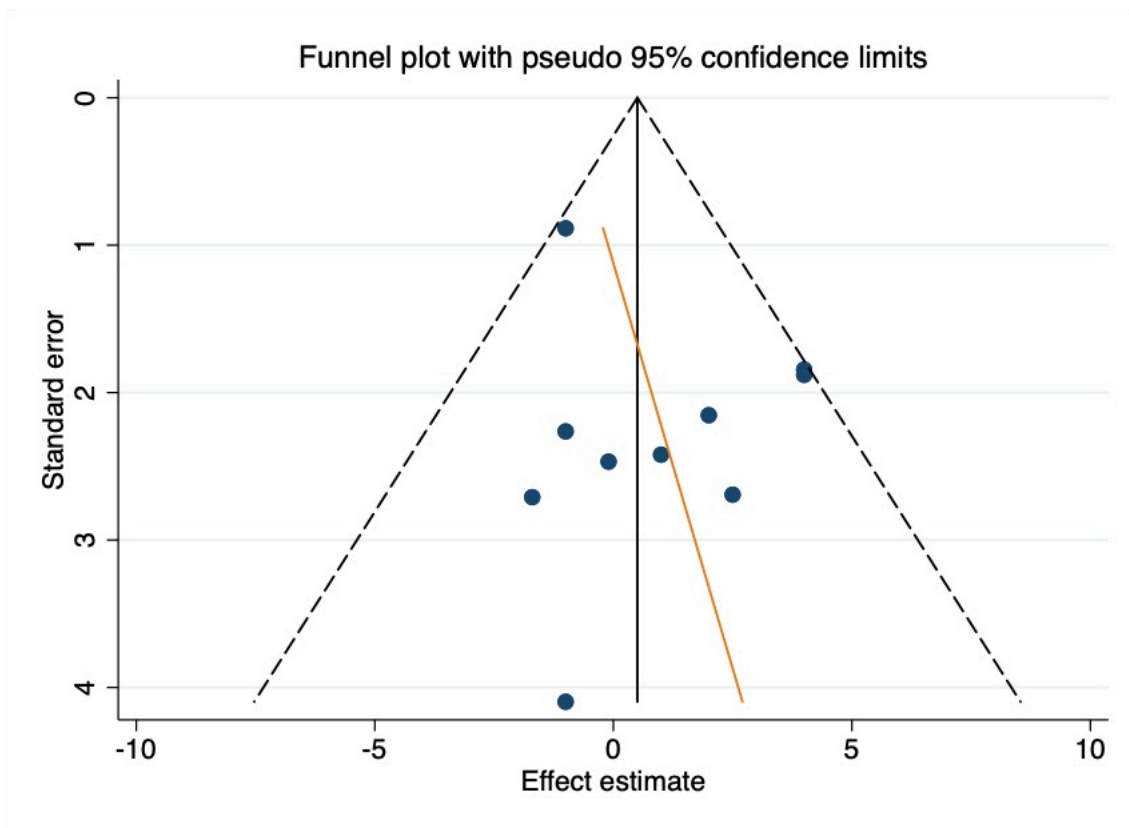

**Figure S34. Subgroup analysis of the effect of bicarbonate therapy on systolic blood pressure according to trial quality.**

Forest plot showing subgroup analysis according to trial quality on the effect of bicarbonate therapy on change in systolic blood pressure. Interaction p-value 0.81

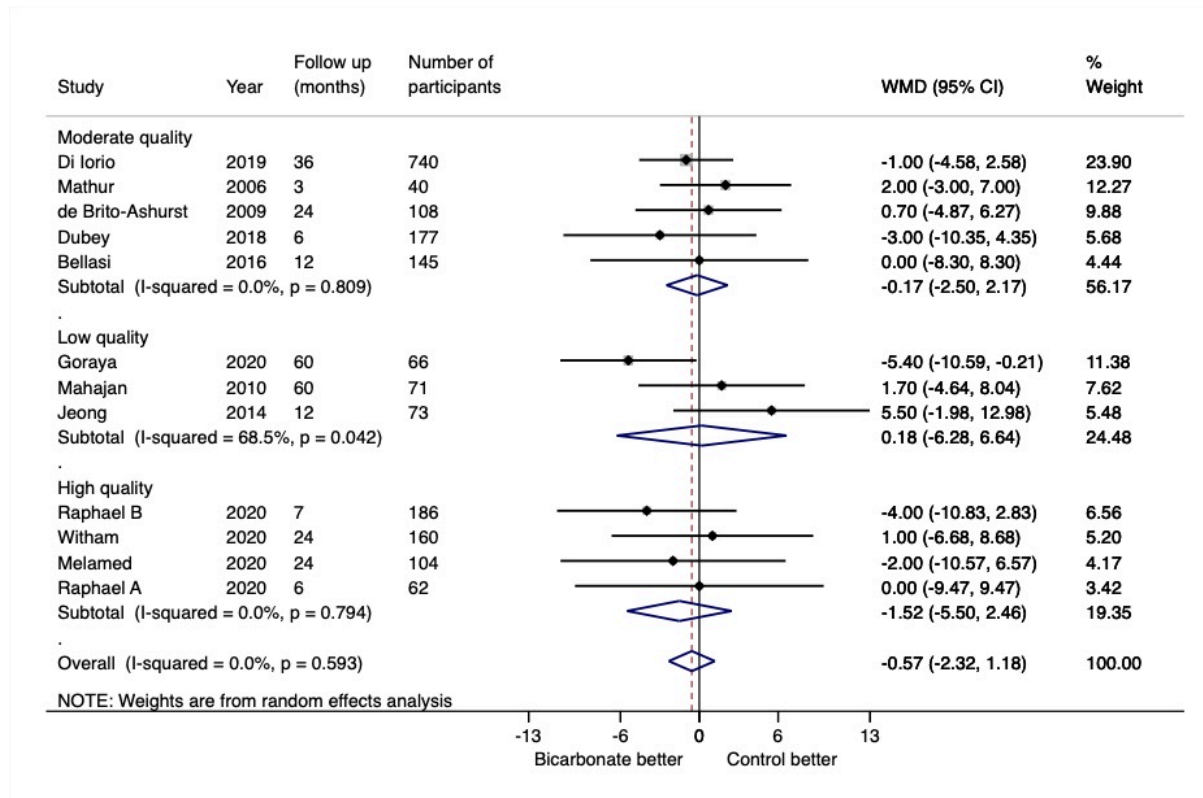

**Figure S35. Subgroup analysis of the effect of bicarbonate therapy on diastolic blood pressure according to trial quality.**

Forest plot showing subgroup analysis according to trial quality on the effect of bicarbonate therapy on change in diastolic blood pressure. Interaction p-value 0.75.

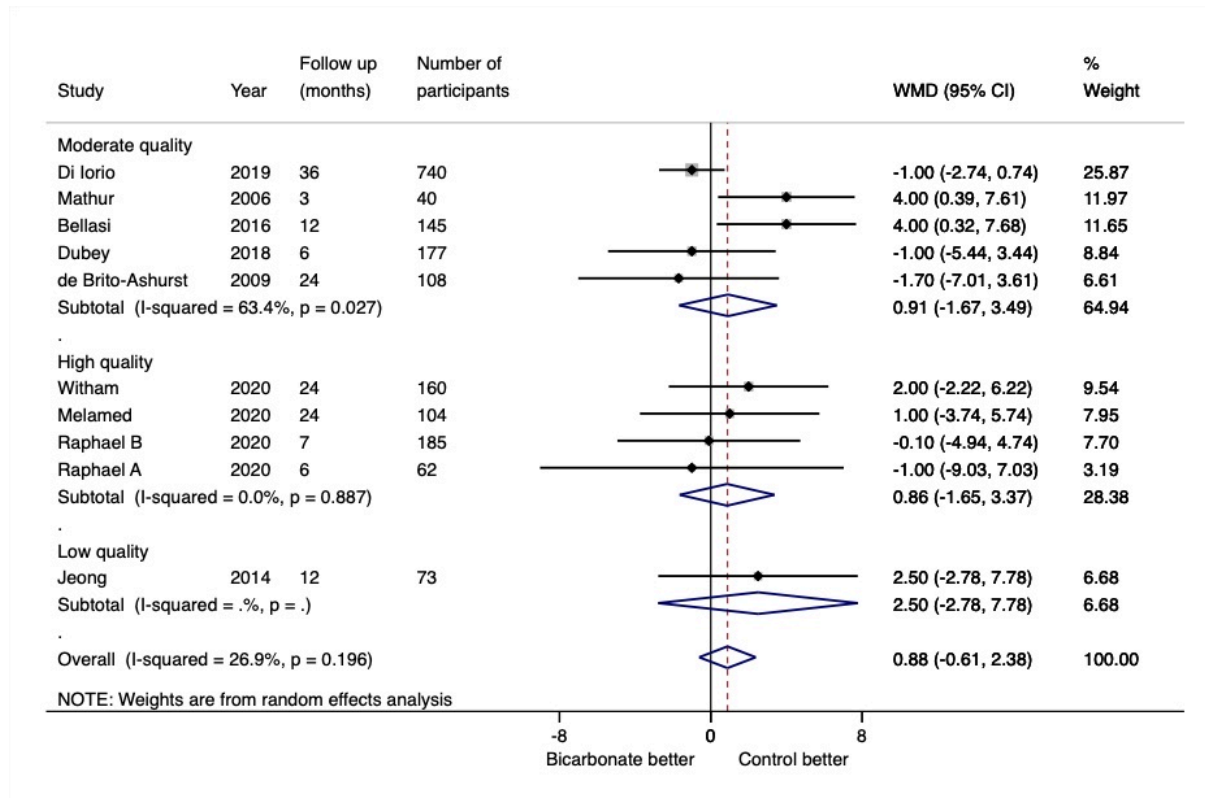

**Figure S36. Subgroup analysis of the effect of bicarbonate therapy on change in weight according to trial quality.**

Forest plot showing subgroup analysis according to trial quality on the effect of bicarbonate therapy on change in weight. Interaction p-value 0.37

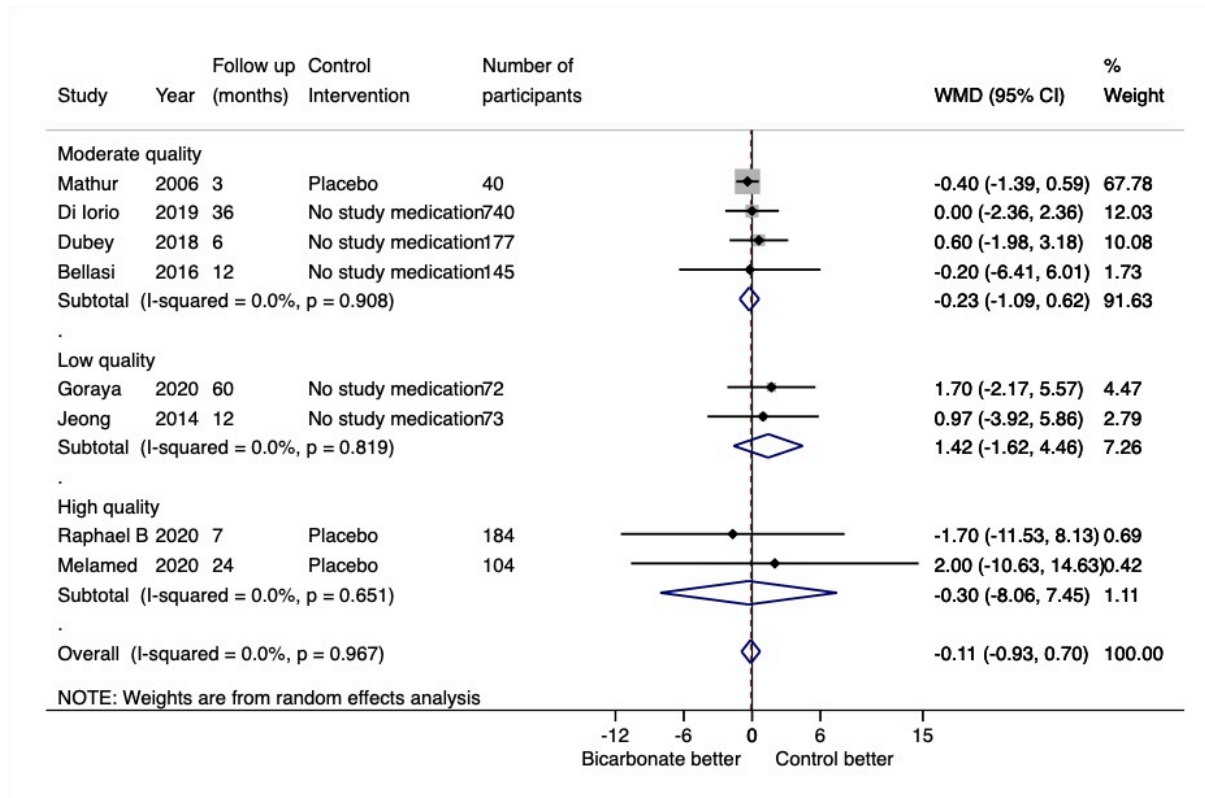

Supplement: mmc1.pdf [file mmc1.pdf]
